# Supplementary material for: Phosphonate-substituted porphyrins as efficient, cost-effective and reusable photocatalysts
Source: Royal Society of Chemistry journal article supplement (doi:10.1039/d4dt00418c), 2024-01-01
Supplement: d4dt00418c1.pdf [file d4dt00418c1.pdf]

## Supporting Information

|                                                                       |     |
|-----------------------------------------------------------------------|-----|
| 1. Materials and methods.....                                         | S2  |
| 2. Synthesis of porphyrins M(TPPP) and M(TPPP-A).....                 | S3  |
| 3. X-ray crystallography of Pd(TPPP-A).....                           | S9  |
| 4. Electrochemical and spectroelectrochemical studies.....            | S15 |
| 5. Studies of optical properties.....                                 | S20 |
| 6. Photostability studies.....                                        | S24 |
| 7. Studies on the single oxygen generation.....                       | S25 |
| 8. DFT calculations.....                                              | S27 |
| 9. Spectral characterization of porphyrins M(TPPP) and M(TPPP-A)..... | S29 |
| 10. References.....                                                   | S44 |

## 1. Materials and methods

### *Materials*

All reagents were obtained commercially unless otherwise noted. All solvents were dried and distilled by standard procedures. Deionized high-purity water (18.2 M $\Omega$  cm) obtained from a Purelab Option (USF Elga) water purification system. Pyrrole was dried over Na<sub>2</sub>SO<sub>4</sub> and distilled under Ar.

### *Methods*

Analytical thin-layer chromatography (TLC) was carried out using Merck silica gel 60 F-254 plates (precoated sheets, 0.2 mm thick, with fluorescence indicator F254). The spots were visualized directly or through illumination with UV lamp ( $\lambda$  = 254/365 nm). Column chromatography purification was carried out on silica gel (silica gel for flash chromatography, 40-63  $\mu$ m, VWR).

### *Spectroscopic measurements*

<sup>1</sup>H, <sup>31</sup>P and <sup>13</sup>C NMR spectra were acquired on a Bruker Avance III 300 MHz spectrometer at room temperature (at 300 MHz, 121 MHz and 75 MHz, respectively). Chemical shifts are given in parts per million (ppm), referenced on the  $\delta$  scale by using residual non-deuterated solvent signals as internal standard for <sup>1</sup>H and <sup>13</sup>C NMR spectroscopy and external phosphonic acid (H<sub>3</sub>PO<sub>4</sub>) for <sup>31</sup>P NMR spectroscopy. The coupling constants are expressed in units of frequency (Hz). In the carbon numbering used in the spectra description, the atoms of the phenyl residue connected to the *meso*- position of the macrocycle are labeled as first, and the protons are labeled accordingly. FT-IR spectra were registered on FT-IR Perkin Elmer Spectrum 65 spectrophotometers using ATR accessory. The UV-vis spectra were recorded using a Jasco V-550 spectrophotometer in a rectangular quartz cells (Hellma, 100-QS, 45  $\times$  12.5  $\times$  12.5 mm, light path 10 mm, chamber volume 3.5 mL). Fluorescence spectroscopic studies were performed using a HORIBA Jobin Yvon Fluorolog spectrophotometer (software FluorEssence) with a standard fluorometer cell (Labbox, LB Q, 10 mm). Emission spectra were recorded after excitation at the corresponding wavelength (shutter: Auto Open, excitation slit = 3 nm and emission slit = 3 nm). All fluorescence spectra were corrected.

### *Mass spectrometry*

Accurate (HR) mass measurements were recorded on a MicrOTOFQ II (Bruker) apparatus equipped with an electrospray ionization (ESI) source. A CHCl<sub>3</sub>/MeOH (1:1) solution was used for the analysis.

## 2. Synthesis of porphyrins M(TPPP) and M(TPPP-A)

The synthesis of free-base porphyrin H<sub>2</sub>(TPPP) has been meticulously optimized. One synthetic approach to H<sub>2</sub>(TPPP) is based on the introduction of the four diethoxyphosphoryl substituents on zinc *meso*-tetra(4-bromophenyl)porphyrinate (Zn(TPPBr)) using the Pd-catalyzed phosphonylation reaction.<sup>1,2</sup> The free base porphyrin H<sub>2</sub>(TPPBr) can be obtained through a known procedure from commercially available 4-bromobenzaldehyde and pyrrole in 30% yield.<sup>3</sup> Purification of H<sub>2</sub>(TPPBr) and Zn(TPPBr) by column chromatography is tedious due to their low solubility in all typical organic solvents, including chlorinated ones. Previous studies have also shown that replacing diethyl phosphite<sup>2</sup> with triisopropyl phosphite<sup>4</sup> in this procedure results in a significant decrease in yield from 68% to 43%.

Thus, the introduction of the diethoxyphosphoryl group in the aldehyde molecule following the classical condensation of pyrrole and diethyl (4-formylphenyl)phosphonate (**1**) under acidic conditions is more convenient, in particular when H<sub>2</sub>(TPPP) should be prepared in gram-scale (Scheme 1). This strategy was significantly simplified by preparing 4-(diethoxyphosphoryl)benzaldehyde from commercially available 4-bromobenzaldehyde and diethyl phosphite in the presence of a Pd(0) catalyst in toluene at 80 °C.<sup>5</sup> Under these experimental conditions, protecting the aldehyde function<sup>6</sup> is no longer required. The cyclization of the aldehyde and pyrrole can be achieved using either propionic acid<sup>6,7</sup> (Adler-Longo reaction<sup>8</sup>) or boron trifluoroetherate<sup>9</sup> (Lindsey method<sup>10</sup>). It was reported that the targeted porphyrin could be obtained with a yield of 50% under Lindsey conditions<sup>9</sup> and with only 32% in propionic acid.<sup>7</sup> However, in our hands, the use of boron trifluoroetherate made it possible to obtain H<sub>2</sub>(TPPP) in only 32–38% yield, but with fairly simple chromatographic purification of the mixtures. It is worth to note that studied condensation reaction proceeds smoothly only in chloroform (CHCl<sub>3</sub>) containing traces of ethanol (about 0.75%),<sup>11</sup> which is a common stabilizer in commercial CHCl<sub>3</sub>. When using chloroform stabilized by amylene, ethanol must be added to the reaction mixture, as the cyclization does not occur without it.

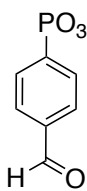

**Diethyl (4-formylphenyl)phosphonate (1).**<sup>5</sup> A dried 250 mL two-necked flask equipped with a magnetic stirrer and a back-flow condenser was charged under Ar with 4-bromobenzaldehyde (4.00 g, 21.6 mmol), Pd(PPh<sub>3</sub>)<sub>4</sub> (100 mg, 0.87 mmol, 4 mol%) and toluene /Et<sub>3</sub>N mixture (56 mL, 1:1 v/v). Then diethyl *H*-phosphonate (3.3 mL, 26.00 mmol, 1.2 equiv.) was added and the mixture was stirred and heated at 80 °C for 12 h. After evaporation under reduced pressure, the residue was purified by column chromatography using a mixture CH<sub>2</sub>Cl<sub>2</sub>/EtOAc (1:1 v/v) as an eluent. The target compound was obtained as a yellow oil in 64% yield (3.35 g). The spectroscopic data of the obtained product were in agreement with those reported in the literature.<sup>5</sup>

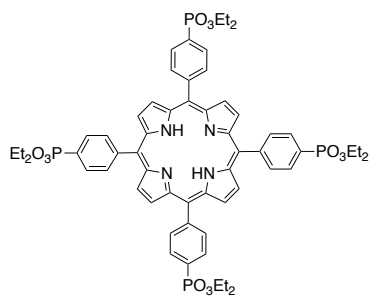

**5,10,15,20-Tetrakis[4-(diethoxyphosphoryl)phenyl]porphyrin (H<sub>2</sub>(TPPP)).**<sup>6,9</sup> A 1 mL two-necked flask equipped with a magnetic stirrer and a back-flow condenser was charged with compound **1** (2.03 g, 8.40 mmol) in chloroform (765 mL) stabilized with ethanol (0.75%). The reaction mixture was started for 30 min while bubbling N<sub>2</sub>. Then freshly distilled pyrrole (583  $\mu$ L, 8.40 mmol, 1 equiv.) and

BF<sub>3</sub>·OEt<sub>2</sub> (770  $\mu$ L, 6.23 mmol, 0.74 equiv.) were added and the reaction mixture was stirred at room temperature for 1 h. Then DDQ (5.72 g, 25.20 mmol, 3 equiv.) was added followed by Et<sub>3</sub>N (1.5 mL) and the reaction mixture was stirred for 1 h. The solvent was removed under reduced pressure and the residue was purified by column chromatography on silica gel using CH<sub>2</sub>Cl<sub>2</sub>/CH<sub>3</sub>OH (97:3 v/v) as an eluent. The porphyrin H<sub>2</sub>(TPPP) was isolated as a purple solid in 35 % yield (3.41 g). The yield can probably be increased by decreasing loading of BF<sub>3</sub>·OEt<sub>2</sub> to 0.27 equiv..<sup>9</sup> <sup>1</sup>H NMR (300 MHz, CDCl<sub>3</sub>, 298 K):  $\delta_{\text{H}}$  8.88 (s, 8 H,  $\beta$ -H), 8.38 (dd, <sup>3</sup>J<sub>H-H</sub> = 8.0 Hz, <sup>4</sup>J<sub>H-P</sub> = 4.1 Hz, 8 H, 2-H<sub>Ph</sub>), 8.27 (dd, <sup>3</sup>J<sub>H-H</sub> = 8.0 Hz, <sup>3</sup>J<sub>H-P</sub> = 13.0 Hz, 8 H, 3-H<sub>Ph</sub>), 4.50–4.38 (m, 16 H, OCH<sub>2</sub>), 1.57 (t, <sup>3</sup>J<sub>H-H</sub> = 7.1 Hz, 24 H, Me) ppm. <sup>31</sup>P{<sup>1</sup>H} NMR (121 MHz, CDCl<sub>3</sub>, 298 K):  $\delta_{\text{P}}$  18.77 ppm. UV–vis (CH<sub>2</sub>Cl<sub>2</sub>):  $\lambda_{\text{max}}$  417, 513, 550, 590, 645 nm. FT-IR (neat):  $\nu_{\text{max}}$  3316 (w), 3104 (w), 2983 (w), 2901 (w), 1602 (m), 1471 (w), 1396 (w), 1247 (s, P=O), 1048 (w), 1014 (s, P–O), 965 (s), 762 (s), 573 (s) cm<sup>–1</sup>.

The spectroscopic data of the obtained product were in agreement with those reported in the literature.<sup>6</sup>

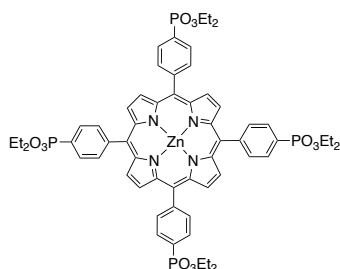

**{5,10,15,20-Tetrakis[4-(diethoxyphosphoryl)phenyl]porphyrinato}zinc(II) (Zn(TPPP)).**<sup>2</sup> A solution of zinc acetate dihydrate (241 mg, 1.10 mmol, 20 equiv.) in methanol (12 mL) was added to a solution of porphyrin H<sub>2</sub>(TPPP) (63 mg, 0.055 mmol) in chloroform (24 mL). The reaction mixture was stirred at room temperature for 12

h. Then, the reaction mixture was washed with water (2  $\times$  30 mL) and the organic layer was dried over Na<sub>2</sub>SO<sub>4</sub>. The volatiles were removed under reduced pressure and the residue was purified by column chromatography using a mixture CHCl<sub>3</sub>/MeOH (96:4 v/v) as an eluent. The Zn(TPPP) complex was obtained as a violet solid. Yield: 90% (60 mg). <sup>1</sup>H NMR (300 MHz, CDCl<sub>3</sub>/CD<sub>3</sub>OD, 2:1 v/v, 298 K):  $\delta_{\text{H}}$  8.80 (s, 8H;  $\beta$ -H), 8.32 (dd, <sup>3</sup>J<sub>H-H</sub> = 8.0 Hz, <sup>4</sup>J<sub>H-P</sub> = 4.1 Hz, 8H, 2-H<sub>Ph</sub>), 8.32 (dd, <sup>3</sup>J<sub>H-P</sub> = 12.4 Hz, <sup>3</sup>J<sub>H-H</sub> = 7.5 Hz, 8H, 3-H<sub>Ph</sub>), 4.43–4.27 (m, 16H, OCH<sub>2</sub>), 1.49 (t, 24H, <sup>3</sup>J<sub>H-H</sub> = 7.0 Hz, Me) ppm. <sup>31</sup>P{<sup>1</sup>H} NMR (CDCl<sub>3</sub>/CD<sub>3</sub>OD, 2:1 v/v, 298 K):  $\delta_{\text{P}}$  18.26 ppm. UV–vis (CH<sub>2</sub>Cl<sub>2</sub>):  $\lambda_{\text{max}}$  [log  $\epsilon$  (M<sup>–1</sup> cm<sup>–1</sup>)] 423 (5.58), 550 (4.23), 592 (sh) nm. FT-IR (neat):  $\nu_{\text{max}}$  2979 (m), 2902 (m), 1598 (m), 1523 (w), 1482 (w), 1441 (w), 1390 (m), 1337 (w), 1245 (s, P=O), 1230 (s, P=O), 1162 (w), 1129 (s), 1097 (w), 1049 (s, P–O), 1013 (s, P–O), 993 (s, P–O), 944 (s, P–O), 990, 788



(s), 763 (s), 714 (s), 580 (s)  $\text{cm}^{-1}$ . HRMS (ESI+):  $m/z$  calcd. for  $1/2(\text{C}_{60}\text{H}_{64}\text{N}_4\text{Na}_2\text{O}_{12}\text{P}_4\text{Zn})$   $[\text{M}+2\text{Na}]^{2+}$  633.12791; found 633.12818; calcd. for  $\text{C}_{60}\text{H}_{64}\text{N}_4\text{NaO}_{12}\text{P}_4\text{Zn}$   $[\text{M}+\text{Na}]^+$  1243.26549 found 1243.26096. The spectroscopic data of the obtained product were in agreement with those reported in the literature.<sup>2</sup>

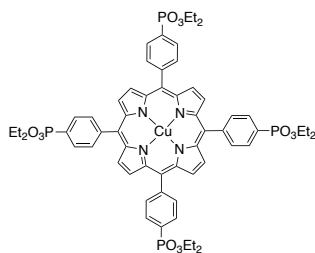

**[5,10,15,20-Tetrakis[(4-(diethoxyphosphoryl)phenyl)]porphyrinato}copper(II) (Cu(TPPP)).**<sup>9</sup> A solution of copper(II) acetate monohydrate (100 mg, 0.55 mmol, 6.4 equiv.) in methanol (15 mL) was added to a solution of porphyrin  $\text{H}_2(\text{TPPP})$  (100 mg, 0.086 mmol) in chloroform (40 mL). The reaction mixture was stirred at room

temperature for 1 h. Then, the reaction mixture was washed with water ( $2 \times 30$  mL) and the organic layer was dried over  $\text{Na}_2\text{SO}_4$ . The volatiles were removed under reduced pressure and the residue was purified by column chromatography using a mixture  $\text{CHCl}_3/\text{MeOH}$  (94:6 v/v) as an eluent. The Cu(TPPP) complex was obtained as a red solid. Yield: 100% (105 mg). FT-IR (neat):  $\nu_{\text{max}}$  2978 (w) 2902 (w), 1599 (m), 1366, 1598 (m), 1520 (w), 1475 (w), 1441 (w), 1388 (m), 1344 (w), 1243 (s, P=O), 1206 (w), 1183 (w), 1161 (w), 1129 (s, P=O), 1098 (w), 1047 (s, P-O), 1013 (s, P-O), 996 (s, P-O), 951 (s, P-O), 934, 790 (s), 763 (s), 716 (s), 583 (s)  $\text{cm}^{-1}$ .

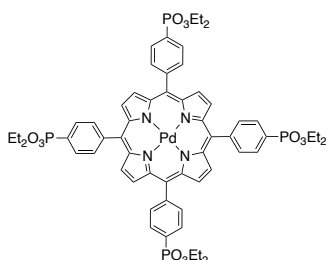

**[5,10,15,20-Tetrakis[(4-(diethoxyphosphoryl)phenyl)]porphyrinato}palladium(II) (Pd(TPPP)).** A solution of palladium acetate (305 mg, 1.36 mmol, 7.8 equiv.) in acetonitrile (40 mL) was added to a solution of porphyrin  $\text{H}_2(\text{TPPP})$  (200 mg, 0.173 mmol) in chloroform (40 mL). The reaction mixture was stirred at reflux for 1

h and then the volatiles were removed under reduced pressure. The residue was purified by column chromatography using a mixture  $\text{CH}_2\text{Cl}_2/\text{MeOH}$  (97:3 v/v) as an eluent. Complex Pd(TPPP) was obtained as a brown solid. Yield: 93% (204 mg).  $^1\text{H}$  NMR (300 MHz,  $\text{CDCl}_3$ , 298 K):  $\delta_{\text{H}}$  8.82 (s, 8H,  $\beta\text{-H}$ ), 8.34–8.29 (m, 8H, 2- $\text{H}_{\text{Ph}}$ ), 8.29–8.21 (m, 8H, 3- $\text{H}_{\text{Ph}}$ ), 4.49–4.35 (m, 16H,  $\text{OCH}_2$ ), 1.55 (t,  $^3J_{\text{H-H}} = 7.1$  Hz, 24H, Me) ppm.  $^{13}\text{C}\{^1\text{H}\}$  NMR (75 MHz,  $\text{CDCl}_3$ , 298 K):  $\delta_{\text{C}}$  145.6 (d,  $^4J_{\text{C-P}} = 3.2$  Hz, 4C, 1- $\text{C}_{\text{Ph}}$ ), 141.3 (s, 8C,  $\alpha\text{-C}$ ), 134.1 (d,  $^3J_{\text{C-P}} = 15.1$  Hz, 8C, 2- $\text{C}_{\text{Ph}}$ ), 131.3 (s, 8C,  $\beta\text{-C}$ ), 130.1 (d,  $^2J_{\text{C-P}} = 10.1$  Hz, 8C, 3- $\text{C}_{\text{Ph}}$ ), 128.4 (d,  $^1J_{\text{C-P}} = 188.9$  Hz, 4C, 4- $\text{C}_{\text{Ph}}$ ), 120.9 (s, 4C, *meso*-C), 64.5 (d,  $^2J_{\text{C-P}} = 5.6$  Hz, 8C,  $\text{OCH}_2$ ), 16.6 (d,  $^3J_{\text{C-P}} = 7.0$  Hz, 8C, Me) ppm.  $^{31}\text{P}\{^1\text{H}\}$  NMR (121 MHz,  $\text{CDCl}_3$ , 298 K):  $\delta_{\text{P}}$  18.73 ppm. UV-vis ( $\text{CH}_2\text{Cl}_2$ ):  $\lambda_{\text{max}}$  [ $\log \varepsilon$  ( $\text{M}^{-1} \text{cm}^{-1}$ )] 415 (5.44), 522 (4.43), 554 (3.51) nm. FT-IR (neat):  $\nu_{\text{max}}$  2981 (w), 1599 (m), 1550 (w), 1441 (w), 1389 (m), 1352 (w), 1245 (s, P=O), 1162 (w), 1129 (m), 1098 (w), 1049 (w), 1010 (s, P-O), 949 (s, P-O), 939 (s, P-O), 793 (s), 764 (s), 712 (m), 588 (s)  $\text{cm}^{-1}$ . HRMS (ESI+):  $m/z$  calcd. for  $1/2(\text{C}_{60}\text{H}_{66}\text{N}_4\text{O}_{14}\text{P}_4\text{Pd})$   $[\text{M}+2\text{H}]^{2+}$  632.1336, found 632.1334; calcd. for  $1/3(\text{C}_{120}\text{H}_{128}\text{Na}_3\text{N}_8\text{O}_{24}\text{P}_8\text{Pd}_2)$   $[2\text{M}+3\text{Na}]^{3+}$  864.4912, found 864.4908; calcd. for

$C_{60}H_{65}N_4O_{12}P_4Pd$   $[M+H]^+$  1263.2599, found 1263.2580; calcd. for  $1/3(C_{240}H_{254}Na_3N_{16}O_{48}P_{16}Pd_4)$   $[4M+3Na]^{3+}$  1705.3299, found 1707.3257; calcd. for  $1/2(C_{180}H_{192}Na_3N_{12}O_{36}P_{12}Pd_3)$   $[3M+2Na]^{2+}$  1916.3687, found 1916.3664.

Doubling the reaction time led to a reduction in product yield up to 65% likely due to decomposition of the complex in the reaction mixture.

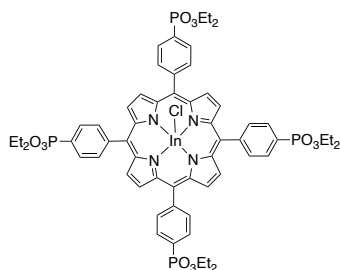

**{5,10,15,20-Tetrakis[4-(diethoxyphosphoryl)phenyl]porphyrinato}indium(III) chloride (In(TPPP)).**

A solution of  $H_2(TPPP)$  (100 mg, 0.087 mmol), indium(III) chloride (58 mg, 0.26 mmol, 3 equiv.) and sodium acetate (213 mg, 2.59 mmol) in glacial acetic acid (64 mL) was refluxed for 2 h. The volatiles were removed under reduced pressure and the solid residue was purified by column chromatography using a mixture  $CH_2Cl_2/MeOH$  (gradient 9:1  $\rightarrow$  2:1 v/v) as an eluent. Complex In(TPPP) was obtained as a blue-violet solid. Yield: 70% (80 mg).  $^1H$  NMR (300 MHz,  $CDCl_3$ , 298 K):  $\delta_H$  9.08 (s, 8H,  $\beta$ -H), 8.52 (br dd,  $^3J_{H-H} = 8.0$  Hz,  $^4J_{H-P} = 4.1$  Hz, 4H, 2- $H_{Ph}$ ), 8.35–8.22 (m, 12H, 2- $H_{Ph}$  and 3- $H_{Ph}$ ), 4.50–4.35 (m, 16H,  $OCH_2$ ), 1.56 (t,  $^3J_{H-H} = 7.1$  Hz, 24 H, Me) ppm.  $^{13}C\{^1H\}$  NMR (75 MHz,  $CDCl_3$ , 298 K): 149.2 (s, 8C,  $\alpha$ -C), 145.5 (d,  $^4J_{C-P} = 3.2$  Hz, 4C, 1- $C_{Ph}$ ), 135.0 (d,  $^3J_{C-P} = 14.8$  Hz, 4C, 2- $C_{Ph}$ ), 134.2 (d,  $^3J_{C-P} = 15.3$  Hz, 4C, 2- $C_{Ph}$ ), 133.0 (s, 8C,  $\beta$ -C), 130.2 (d,  $^2J_{C-P} = 12.7$  Hz, 8C, 3- $C_{Ph}$ ), 128.6 (d,  $^1J_{C-P} = 189.2$  Hz, 4C, 4- $C_{Ph}$ ), 120.9 (s, 4C, *meso*-C), 62.7 (d,  $^2J_{C-P} = 5.7$  Hz, 8C,  $OCH_2$ ), 16.6 (d,  $^3J_{C-P} = 6.3$  Hz, 8C, Me) ppm.  $^{31}P\{^1H\}$  NMR (121 MHz,  $CDCl_3$ , 298 K):  $\delta_P$  18.51 ppm. UV–vis ( $CH_2Cl_2$ ):  $\lambda_{max}$  [ $\log \epsilon$  ( $M^{-1} cm^{-1}$ )] 404 (4.60), 426 (5.79), 518 (3.49), 559 (4.33), 598 (3.91) nm. FT-IR (neat):  $\nu_{max}$  3109 (w), 2978 (w), 2903 (w), 1599 (m), 1474 (w), 1392 (w), 1245 (s, P=O), 1130 (m), 1050 (s, P–O), 1008 (s), 974 (s, P–O), 764 (m), 583 (m)  $cm^{-1}$ . HRMS(ESI<sup>+</sup>):  $m/z$  calcd. for  $1/2(C_{60}H_{65}N_4O_{14}P_4In)$   $[M-Cl+H]^{2+}$  636.1289, found 636.1303;  $1/3(C_{120}H_{129}N_8O_{24}P_8In_2)$   $[2M-2Cl+H]^{3+}$  847.8362, found 847.8389;  $C_{60}H_{64}N_4O_{12}P_4In$   $[M-Cl]^+$  1271.2505, found 1271.2532;  $C_{60}H_{65}N_4O_{12}P_4In$   $[M+H]^+$  1307.2271, found 1307.2295.

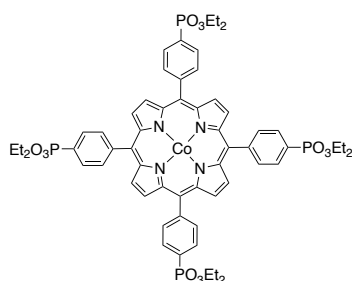

**{5,10,15,20-Tetrakis[4-(diethoxyphosphoryl)phenyl]porphyrinato}cobalt(II) (Co(TPPP)).**

A solution of cobalt(II) acetate tetrahydrate (92 mg, 0.52 mmol, 5.9 equiv.) in methanol (3 mL) was added to a solution of porphyrin  $H_2(TPPP)$  (103 mg, 0.089 mmol) in chloroform (13 mL). The reaction mixture was refluxed for 2 h under Ar. Then, the volatiles were removed under reduced pressure and the residue was purified by column chromatography using a mixture  $CH_2Cl_2/MeOH$  (97 : 3 v/v) as an eluent. The Co(TPPP) complex was obtained as a burgundy solid. Yield: 60% (65 mg). UV–vis ( $CH_2Cl_2$ ):  $\lambda_{max}$  [ $\log \epsilon$  ( $M^{-1} cm^{-1}$ )] 412 (5.40), 438 (4.44), 528 (4.21) nm. FT-IR (neat):  $\nu_{max}$  2980 (w), 2902 (w), 1599 (m), 1444 (w), 1389 (w), 1244 (s, P=O), 1129 (m), 1046 (s, P–O), 1013 (s, P–O), 997 (w), 768

(s)  $\text{cm}^{-1}$ . HRMS(ESI<sup>+</sup>):  $m/z$  calcd. for  $\text{C}_{60}\text{H}_{64}\text{N}_4\text{Na}_2\text{O}_{12}\text{P}_4\text{Co}$   $[\text{M}+2\text{Na}]^{2+}$  630.6294, found 630.6306 ; calcd. for  $1/3(\text{C}_{120}\text{H}_{128}\text{Na}_3\text{N}_8\text{O}_{24}\text{P}_8\text{Co}_2)$   $[2\text{M}+3\text{Na}]^{3+}$  833.5105, found 833.5130; calcd. for  $\text{C}_{60}\text{H}_{65}\text{N}_4\text{O}_{12}\text{P}_4\text{Co}$   $[\text{M}+\text{H}]^+$  1216.2876, found 1216.2869 ; calcd. for  $1/3(\text{C}_{240}\text{H}_{254}\text{Na}_3\text{N}_{16}\text{O}_{48}\text{P}_{16}\text{Co}_4)$   $[4\text{M}+3\text{Na}]^{3+}$  1643.3630, found 1643.3672 ; calcd. for  $1/2(\text{C}_{180}\text{H}_{192}\text{Na}_3\text{N}_{12}\text{O}_{36}\text{P}_{12}\text{Co}_3)$   $[3\text{M}+2\text{Na}]^{2+}$  1845.9097, found 1845.9119.

**Synthesis of porphyrins M(TPPP-A).** *General Procedure.* A Schlenk tube was charged with the porphyrin M(TPPP) (0.05 mmol), and the evacuation/inert gas refill cycle was repeated three times. Anhydrous  $\text{CH}_2\text{Cl}_2$  (5 mL) and bromotrimethylsilane (25–35 equiv.) were added by syringe, and the reaction mixture was stirred for 48 h at room temperature. The volatiles were distilled under reduced pressure and MeOH (2 mL) was added, and the solution was stirred for 1 h at room temperature. Evaporation of the volatiles afforded M(TPPP-A) as a crystalline powder in quantitative yield. A low solubility of the reaction products in organic solvents has prevented their purification by column chromatography.

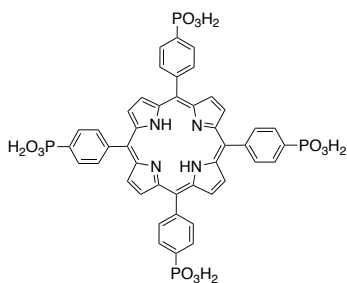

**5,10,15,20-Tetrakis[(4-(dihydroxyphosphoryl)phenyl)]porphyrin ( $\text{H}_2(\text{TPPP-A})$ )<sup>1</sup>**

was prepared from  $\text{H}_2(\text{TPPP})$  (100 mg, 0.086 mmol) and bromotrimethylsilane (285  $\mu\text{L}$ , 2.16 mmol, 25 equiv.). <sup>1</sup>H NMR (300 MHz,  $\text{DMSO-}d_6$ ):  $\delta_{\text{H}}$  8.84 (s, 8H,  $\beta$ -H), 8.33 (dd,  $^3J_{\text{H-H}} = 7.9$  Hz,  $^4J_{\text{H-P}} = 3.3$  Hz, 8H, 2- $\text{H}_{\text{Ph}}$ ), 8.14 (dd,  $^3J_{\text{H-H}} = 7.9$  Hz,  $^3J_{\text{H-P}} = 12.7$  Hz, 8H, 3- $\text{H}_{\text{Ph}}$ ), −2.98 (br s, 2H, NH) ppm. The protons of the phosphonic acid groups were not observed due to overlapping with peaks from residual water. <sup>31</sup>P{<sup>1</sup>H} NMR (121 MHz,  $\text{DMSO-}d_6$ ):  $\delta_{\text{P}}$  12.7 (s) ppm. UV–vis ( $\text{MeCN}/\text{H}_2\text{O}$  (1:1 v/v) + 1 drop of 0.1 M NaOH):  $\lambda_{\text{max}}$  [ $\log \epsilon$  ( $\text{M}^{-1} \text{cm}^{-1}$ )] 399 (4.82), 416 (5.54), 482 (3.43), 516 (4.11), 552 (3.88), 589 (3.62), 644 (3.62) nm. FT-IR (neat):  $\nu_{\text{max}}$  3025 (w), 2890 (w), 2757 (w), 1599 (w), 1551 (w), 1486 (s), 1396 (m), 1229 (w), 1196 (w), 997 (w), 981 (w), 910 (m), 852 (m), 700 (m)  $\text{cm}^{-1}$ . The spectroscopic data of the obtained product were in agreement with those reported in the literature.<sup>4</sup>

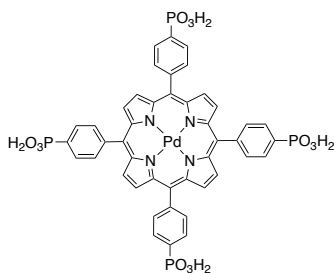

**{5,10,15,20-Tetrakis[(4-(dihydroxyphosphoryl)phenyl)]porphyrinato}palladium(II) ( $\text{Pd}(\text{TPPP-A})$ )**

was prepared from  $\text{Pd}(\text{TPPP})$  (80 mg, 0.063 mmol) and bromotrimethylsilane (270  $\mu\text{L}$ , 2.05 mmol, 33 equiv.). <sup>1</sup>H NMR (300 MHz,  $\text{D}_2\text{O}$  + 1 drop of NaOD (40% in  $\text{D}_2\text{O}$ )):  $\delta_{\text{H}}$  8.77 (br s, 8H, H- $\beta$ ), 8.08 (br s, 16H, 2- $\text{H}_{\text{Ph}}$  and 3- $\text{H}_{\text{Ph}}$ ) ppm. <sup>1</sup>H NMR (300 MHz,  $\text{DMSO-}d_6$ ):  $\delta_{\text{H}}$  8.78 (s, 8H,  $\beta$ -H), 8.27 (dd,  $^3J_{\text{H-H}} = 7.8$  Hz,  $^4J_{\text{H-P}} = 2.0$  Hz, 8H, 2- $\text{H}_{\text{Ph}}$ ), 8.12 (dd,  $^3J_{\text{H-H}} = 7.8$  Hz,  $^3J_{\text{H-P}} = 12.7$  Hz, 8H, 3- $\text{H}_{\text{Ph}}$ ) ppm. <sup>13</sup>C{<sup>1</sup>H} NMR (75 MHz,  $\text{D}_2\text{O}$  + 1 drop of NaOD (40% in  $\text{D}_2\text{O}$ )):  $\delta_{\text{C}}$  143.53 (d,  $^4J_{\text{C-P}} = 2.3$  Hz, 4C, 1- $\text{C}_{\text{Ph}}$ ), 143.43 (s, 8C,  $\alpha$ -C), 142.80 (d,  $^1J_{\text{C-P}} = 165.9$  Hz, 4C, C-4( $\text{Ph}$ ), 136.1 (d,  $^3J_{\text{C-P}} = 12.8$  Hz, 8C, 2- $\text{C}_{\text{Ph}}$ ), 133.9 (s, 8C, C- $\beta$ ), 131.2 (d,  $^2J_{\text{C-P}} = 9.0$  Hz, 8C, 3- $\text{C}_{\text{Ph}}$ ), 124.1 (s, 4C, *meso*-C) ppm. <sup>31</sup>P{<sup>1</sup>H} NMR (121 MHz,  $\text{D}_2\text{O}$  + 1 drop of NaOD (40% in  $\text{D}_2\text{O}$ )):  $\delta_{\text{P}}$  11.41 ppm. <sup>31</sup>P{<sup>1</sup>H} NMR (121 MHz,  $\text{DMSO-}d_6$ ):  $\delta_{\text{P}}$  12.3 (s) ppm.

$^{13}\text{C}\{^1\text{H}\}$  NMR (75 MHz,  $\text{D}_2\text{O}$  + 1 drop of NaOD (40% in  $\text{D}_2\text{O}$ )):  $\delta_{\text{C}}$  143.5 (d,  $^4J_{\text{C-P}} = 2.2$  Hz, 4C, 1- $\text{C}_{\text{Ph}}$ ), 141.1 (s, 8C,  $\alpha$ -C), 135.3 (s, 8C, 4- $\text{C}_{\text{Ph}}$ ), 134.1 (d,  $^3J_{\text{C-P}} = 10.8$  Hz, 8 C, 2- $\text{C}_{\text{Ph}}$ ), 133.5 (s, 4C, 4- $\text{C}_{\text{Ph}}$ ), 131.8 (s, 8C,  $\beta$ -C), 129.7 (d,  $^2J_{\text{C-P}} = 7.5$  Hz, 8C, 3- $\text{C}_{\text{Ph}}$ ), 121.7 (s, 4C, *meso*-C) ppm. UV-vis ( $\text{MeCN}/\text{H}_2\text{O}$  (1:1 v/v) + 1 drop of 0.1 M NaOH):  $\lambda_{\text{max}}$  [ $\log \epsilon (\text{M}^{-1} \text{cm}^{-1})$ ] 415 (5.33), 463 (3.78), 523 (4.23), 556 (3.29) nm. FT-IR (neat):  $\nu_{\text{max}}$  3211 (s), 1627 (m), 1454 (w), 1351 (w), 1128 (w), 1050 (m), 1013 (w), 961 (m), 885 (w), 791 (w), 706 (w)  $\text{cm}^{-1}$ . HRMS(ESI+):  $m/z$  calcd. for  $\text{C}_{44}\text{H}_{29}\text{N}_4\text{O}_{12}\text{P}_4\text{Pd}$  [ $\text{M}-3\text{H}$ ] $^{3-}$  344.9933, found 344.9945; calcd. for  $\text{C}_{44}\text{H}_{29}\text{N}_4\text{O}_{12}\text{P}_4\text{Pd}$  [ $\text{M}-2\text{H}$ ] $^{2-}$  517.9936, found 517.9951.

Hydrolysis of diethoxyphosphoryl groups of  $\text{H}_2(\text{TPPP})$  in concentrated hydrochloric acid (HCl) proceeded very slowly even under reflux probably due to a low solubility of starting and partially hydrolyzed porphyrins.

### 3. X-ray crystallography of Pd(TPPP-A)

#### Structure Quality Indicators

|                     |                                 |        |                 |      |          |       |            |       |
|---------------------|---------------------------------|--------|-----------------|------|----------|-------|------------|-------|
| <b>Reflections:</b> | d min (Mo)<br>2 $\Theta$ =50.0° | 0.84   | I/ $\sigma$ (I) | 29.4 | Rint     | 8.78% | Full 50.0° | 99.9  |
| <b>Refinement:</b>  | Shift                           | -0.001 | Max Peak        | 0.9  | Min Peak | -0.7  | Goof       | 1.123 |

Data were measured using  $\phi$  and  $\omega$  scans with Mo  $K_{\alpha 1}$  radiation. The diffraction pattern was indexed and the total number of runs, and images was based on the strategy calculation from the program APEX4. The maximum resolution that was achieved was  $\Theta = 25.000^\circ$  (0.84 Å). The unit cell was refined using SAINT V8.40B<sup>12</sup> on 9795 reflections, 6% of the observed reflections. Data reduction, scaling and absorption corrections were performed using SAINT V8.40B.<sup>12</sup> The final completeness is 99.90 % out to  $25^\circ$  in  $\Theta$ . SADABS-2016/2<sup>12</sup> was used for absorption correction.  $wR_2(\text{int})$  was 0.0780 before and 0.0675 after correction. The ratio of minimum to maximum transmission is 0.8378. The absorption coefficient  $\mu$  of this material is  $0.474 \text{ mm}^{-1}$  at this wavelength ( $\lambda = 0.71073 \text{ Å}$ ) and the minimum and maximum transmissions are 0.671 and 0.801. The structure was solved, and the space group  $P-1$  (# 2) determined by the ShelXT<sup>13,14</sup> structure solution program using dual methods and refined by full matrix least squares minimisation on  $F^2$  using version 2018/3 of ShelXL.<sup>13,14</sup> All non-hydrogen atoms were refined anisotropically, excepted minor disordered part of phenyl group. Hydrogen atom positions were calculated geometrically and refined using the riding model. There is a single molecule in the asymmetric unit, which is represented by the reported sum formula. In other words:  $Z$  is 2 and  $Z'$  is 1.

The crystal structure of  $(\text{Me}_2\text{NH}_2)_2[\text{Pd}(\text{TPPP-A})_{-2\text{H}}]$  contains one solvent accessible void in the unit cell. Despite numerous attempts, no sensible solvent model could be established, and the solvent is assumed to be chaotically disordered within the voids. The crystals had been obtained from a mixture of DMF and water. The method implemented in Olex2 is based on that described by van der Sluis and Spek,<sup>15</sup> upon which the SQUEEZE routine in PLATON<sup>16</sup> is also based. The program allows to mathematically subtract the contribution of disordered solvent contained in voids within the crystal lattice from the diffraction intensities. This procedure was applied to the data file and the submitted model is based on the “solvent removed” data. Squeeze located one void (Table S6) with a volume of  $777 \text{ Å}^3$ , each of which large enough to accommodate approximately 8 molecules of DMF. From each void, the program removed the contribution of 318 electrons, corresponding to 99% of the electrons of eight DMF (40 electrons) molecules.

**Table S1.** Crystal Data and Structure Refinement for (Me<sub>2</sub>NH<sub>2</sub>)<sub>2</sub>[Pd(TPPP-A)<sub>2</sub>H].

|                                                |                                                                                  |
|------------------------------------------------|----------------------------------------------------------------------------------|
| Formula                                        | C <sub>48</sub> H <sub>45</sub> N <sub>6</sub> O <sub>12</sub> P <sub>4</sub> Pd |
| CCDC                                           | 2290735                                                                          |
| <i>D</i> <sub>calc.</sub> / g cm <sup>-3</sup> | 1.254                                                                            |
| $\mu$ /mm <sup>-1</sup>                        | 0.474                                                                            |
| Formula Weight                                 | 1128.18                                                                          |
| Colour                                         | clear dark violet                                                                |
| Shape                                          | needle-shaped                                                                    |
| Size/mm <sup>3</sup>                           | 0.43x0.18x0.13                                                                   |
| <i>T</i> /K                                    | 110.0(1)                                                                         |
| Crystal System                                 | triclinic                                                                        |
| Space Group                                    | <i>P</i> -1                                                                      |
| <i>a</i> /Å                                    | 13.0368(4)                                                                       |
| <i>b</i> /Å                                    | 13.9158(5)                                                                       |
| <i>c</i> /Å                                    | 18.0430(6)                                                                       |
| $\alpha$ /°                                    | 69.419(2)                                                                        |
| $\beta$ /°                                     | 81.680(2)                                                                        |
| $\gamma$ /°                                    | 78.062(2)                                                                        |
| <i>V</i> /Å <sup>3</sup>                       | 2988.85(18)                                                                      |
| <i>Z</i>                                       | 2                                                                                |
| <i>Z</i> '                                     | 1                                                                                |
| Wavelength/Å                                   | 0.71073                                                                          |
| Radiation type                                 | Mo K $\alpha$ 1                                                                  |
| $\theta_{min}$ /°                              | 1.209                                                                            |
| $\theta_{max}$ /°                              | 25.000                                                                           |
| Measured Refl's.                               | 175832                                                                           |
| Indep't Refl's                                 | 10535                                                                            |
| Refl's $I \geq 2 \sigma(I)$                    | 8528                                                                             |
| <i>R</i> <sub>int</sub>                        | 0.0878                                                                           |
| Parameters                                     | 666                                                                              |
| Restraints                                     | 0                                                                                |
| Largest Peak                                   | 0.940                                                                            |
| Deepest Hole                                   | -0.742                                                                           |
| GooF                                           | 1.123                                                                            |
| <i>wR</i> <sub>2</sub> (all data)              | 0.1521                                                                           |
| <i>wR</i> <sub>2</sub>                         | 0.1437                                                                           |
| <i>R</i> <sub>1</sub> (all data)               | 0.0767                                                                           |
| <i>R</i> <sub>1</sub>                          | 0.0606                                                                           |

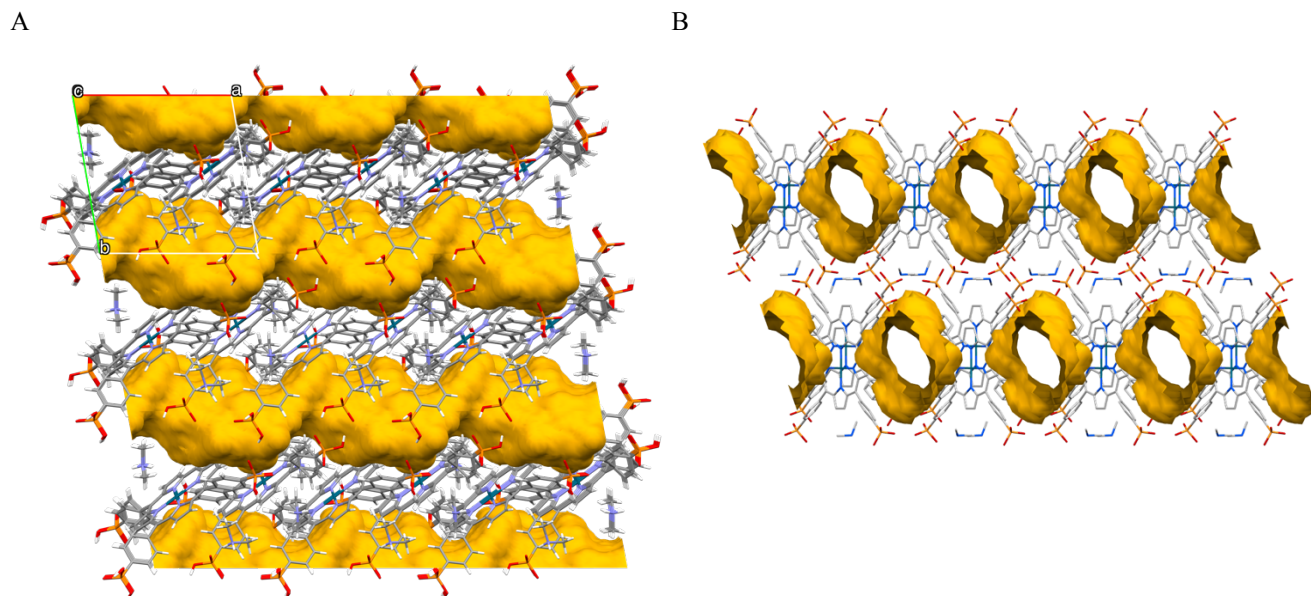

**Figure S1.** The structure of microporous HOF of  $(\text{Me}_2\text{NH}_2)_2[\text{Pd}(\text{TPPP-A})_{-2\text{H}}]$  showing organization of 1D pores (view along  $[100]$  (A) and  $[101]$  (B) crystallographic directions).

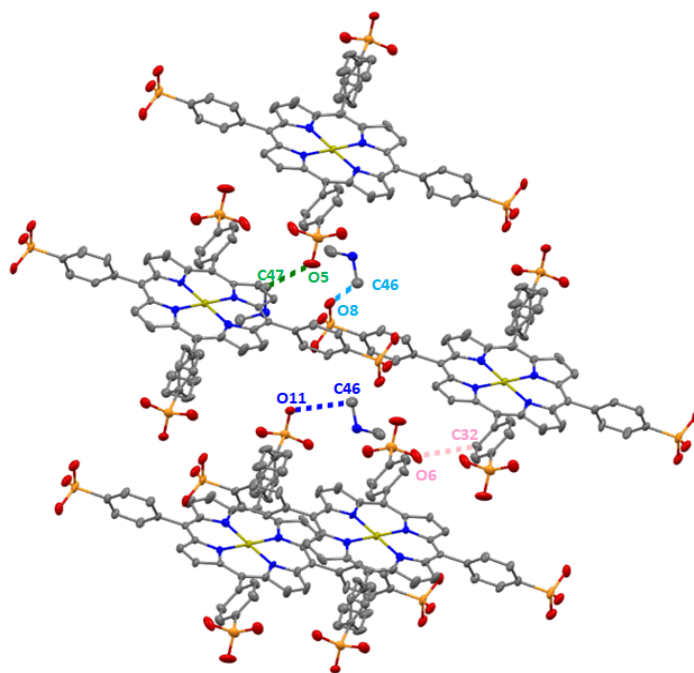

**Figure S2.** Schematic presentation of C—H...O bonding in the crystal  $(\text{Me}_2\text{NH}_2)_2[\text{Pd}(\text{TPPP-A})_{-2\text{H}}]$ .



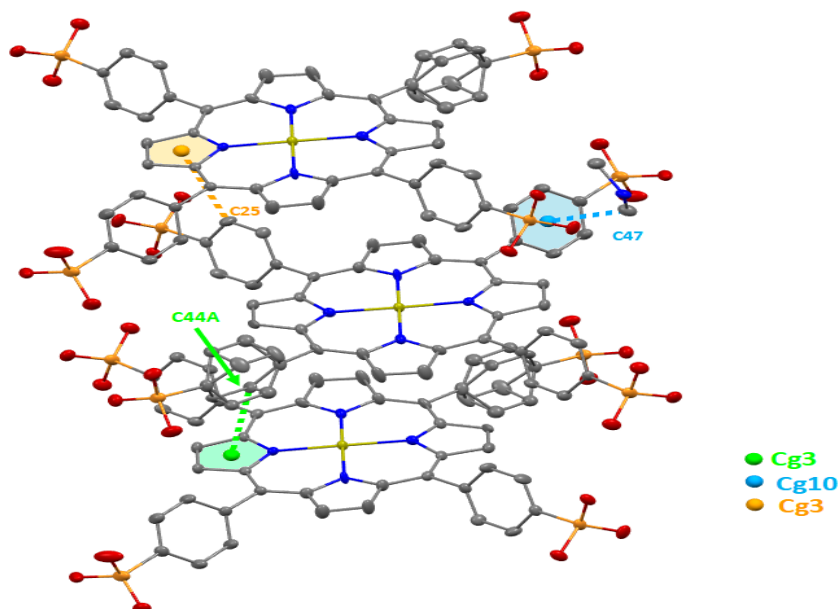

**Figure S3.** Schematic presentation of C—H...Cg bonding in the crystal  $(\text{Me}_2\text{NH}_2)_2[\text{Pd}(\text{TPPP-A})\cdot 2\text{H}]$ .

**Table S2.** Bond Lengths in Å for  $(\text{Me}_2\text{NH}_2)_2[\text{Pd}(\text{TPPP-A})\cdot 2\text{H}]$ .

| Atom | Atom | Length   | Atom | Atom | Length    |
|------|------|----------|------|------|-----------|
| Pd1  | N3   | 2.018(4) | C1   | C2   | 1.429(8)  |
| Pd1  | N1   | 2.021(4) | C36  | C37  | 1.379(8)  |
| Pd1  | N4   | 2.022(5) | C36  | C35  | 1.382(8)  |
| Pd1  | N2   | 2.032(4) | C11  | C10  | 1.402(7)  |
| P1   | O3   | 1.562(4) | C11  | C12  | 1.426(7)  |
| P1   | O2   | 1.506(4) | C20  | C19  | 1.383(8)  |
| P1   | O1   | 1.519(4) | C20  | C39  | 1.497(7)  |
| P1   | C24  | 1.797(5) | C27  | C10  | 1.483(7)  |
| P4   | O10  | 1.512(4) | C27  | C32  | 1.384(8)  |
| P4   | O12  | 1.566(4) | C27  | C28  | 1.391(8)  |
| P4   | O11  | 1.500(4) | C37  | C38  | 1.382(8)  |
| P4   | C42  | 1.803(5) | C19  | C18  | 1.425(8)  |
| P3   | O9   | 1.509(4) | C33  | C15  | 1.497(7)  |
| P3   | O8   | 1.529(4) | C33  | C38  | 1.378(8)  |
| P3   | O7   | 1.555(5) | C33  | C34  | 1.397(8)  |
| P3   | C36  | 1.803(5) | C10  | C9   | 1.394(7)  |
| P2   | O4   | 1.500(4) | C15  | C14  | 1.401(7)  |
| P2   | O6   | 1.549(5) | C15  | C16  | 1.398(7)  |
| P2   | O5   | 1.518(5) | C2   | C3   | 1.347(8)  |
| P2   | C30  | 1.802(5) | C26  | C25  | 1.401(8)  |
| N3   | C11  | 1.373(6) | C42  | C43A | 1.373(10) |
| N3   | C14  | 1.376(6) | C42  | C41A | 1.395(10) |
| N1   | C4   | 1.373(6) | C42  | C43  | 1.30(2)   |
| N1   | C1   | 1.376(7) | C42  | C41  | 1.43(2)   |
| N4   | C19  | 1.373(7) | C12  | C13  | 1.346(7)  |
| N4   | C16  | 1.380(7) | C7   | C8   | 1.341(8)  |
| N2   | C6   | 1.366(7) | C7   | C6   | 1.444(8)  |
| N2   | C9   | 1.380(7) | C32  | C31  | 1.357(8)  |
| C21  | C5   | 1.494(7) | C28  | C29  | 1.392(8)  |
| C21  | C26  | 1.390(8) | C23  | C22  | 1.384(8)  |
| C21  | C22  | 1.382(8) | C23  | C24  | 1.366(8)  |
| C4   | C5   | 1.401(7) | C34  | C35  | 1.385(8)  |
| C4   | C3   | 1.428(7) | C14  | C13  | 1.433(7)  |
| C5   | C6   | 1.379(8) | C31  | C30  | 1.386(8)  |
| C1   | C20  | 1.394(7) | C29  | C30  | 1.395(8)  |
|      |      |          | C8   | C9   | 1.436(8)  |



| Atom | Atom | Length    |
|------|------|-----------|
| C25  | C24  | 1.397(8)  |
| C17  | C18  | 1.343(8)  |
| C17  | C16  | 1.436(8)  |
| C43A | C44A | 1.411(11) |
| C44A | C39  | 1.386(10) |
| C40A | C41A | 1.388(12) |
| C40A | C39  | 1.388(10) |
| C39  | C40  | 1.52(3)   |

| Atom | Atom | Length   |
|------|------|----------|
| C39  | C44  | 1.26(3)  |
| N5   | C46  | 1.471(8) |
| N5   | C45  | 1.478(8) |
| N6   | C47  | 1.458(7) |
| N6   | C48  | 1.499(7) |
| C40  | C41  | 1.37(3)  |
| C44  | C43  | 1.42(3)  |

**Table S3.** Bond Angles in ° for (Me<sub>2</sub>NH<sub>2</sub>)<sub>2</sub>[Pd(TPPP-A)<sub>2</sub>H].

| Atom | Atom | Atom | Angle      |
|------|------|------|------------|
| N3   | Pd1  | N1   | 178.98(18) |
| N3   | Pd1  | N4   | 90.25(17)  |
| N3   | Pd1  | N2   | 89.94(16)  |
| N1   | Pd1  | N4   | 90.03(17)  |
| N1   | Pd1  | N2   | 89.78(16)  |
| N4   | Pd1  | N2   | 179.45(19) |
| O3   | P1   | C24  | 104.2(2)   |
| O2   | P1   | O3   | 111.4(2)   |
| O2   | P1   | O1   | 113.3(2)   |
| O2   | P1   | C24  | 108.3(2)   |
| O1   | P1   | O3   | 110.6(3)   |
| O1   | P1   | C24  | 108.6(2)   |
| O10  | P4   | O12  | 109.7(3)   |
| O10  | P4   | C42  | 108.1(2)   |
| O12  | P4   | C42  | 104.3(3)   |
| O11  | P4   | O10  | 113.7(2)   |
| O11  | P4   | O12  | 112.3(2)   |
| O11  | P4   | C42  | 108.2(3)   |
| O9   | P3   | O8   | 115.4(2)   |
| O9   | P3   | O7   | 111.1(3)   |
| O9   | P3   | C36  | 109.6(2)   |
| O8   | P3   | O7   | 109.0(3)   |
| O8   | P3   | C36  | 107.6(3)   |
| O7   | P3   | C36  | 103.4(2)   |
| O4   | P2   | O6   | 111.8(3)   |
| O4   | P2   | O5   | 118.4(3)   |
| O4   | P2   | C30  | 110.2(3)   |
| O6   | P2   | C30  | 106.2(3)   |
| O5   | P2   | O6   | 104.8(3)   |
| O5   | P2   | C30  | 104.6(3)   |
| C11  | N3   | Pd1  | 127.4(3)   |
| C11  | N3   | C14  | 106.0(4)   |
| C14  | N3   | Pd1  | 126.6(3)   |
| C4   | N1   | Pd1  | 126.6(3)   |
| C4   | N1   | C1   | 106.9(4)   |
| C1   | N1   | Pd1  | 126.1(3)   |
| C19  | N4   | Pd1  | 126.5(4)   |
| C19  | N4   | C16  | 106.3(4)   |
| C16  | N4   | Pd1  | 127.1(3)   |
| C6   | N2   | Pd1  | 126.0(3)   |
| C6   | N2   | C9   | 107.3(4)   |
| C9   | N2   | Pd1  | 126.3(3)   |
| C26  | C21  | C5   | 121.2(5)   |
| C22  | C21  | C5   | 120.0(5)   |
| C22  | C21  | C26  | 118.8(5)   |
| N1   | C4   | C5   | 126.1(5)   |
| N1   | C4   | C3   | 109.5(5)   |
| C5   | C4   | C3   | 124.4(5)   |

| Atom | Atom | Atom | Angle     |
|------|------|------|-----------|
| C4   | C5   | C21  | 117.1(5)  |
| C6   | C5   | C21  | 119.2(5)  |
| C6   | C5   | C4   | 123.7(5)  |
| N1   | C1   | C20  | 126.2(5)  |
| N1   | C1   | C2   | 108.5(5)  |
| C20  | C1   | C2   | 125.2(5)  |
| C37  | C36  | P3   | 119.4(4)  |
| C37  | C36  | C35  | 118.4(5)  |
| C35  | C36  | P3   | 122.3(4)  |
| N3   | C11  | C10  | 125.7(5)  |
| N3   | C11  | C12  | 109.6(4)  |
| C10  | C11  | C12  | 124.7(5)  |
| C1   | C20  | C39  | 116.7(5)  |
| C19  | C20  | C1   | 124.2(5)  |
| C19  | C20  | C39  | 119.0(5)  |
| C32  | C27  | C10  | 122.5(5)  |
| C32  | C27  | C28  | 117.3(5)  |
| C28  | C27  | C10  | 120.2(5)  |
| C36  | C37  | C38  | 121.3(5)  |
| N4   | C19  | C20  | 126.3(5)  |
| N4   | C19  | C18  | 109.4(5)  |
| C20  | C19  | C18  | 124.2(5)  |
| C38  | C33  | C15  | 120.4(5)  |
| C38  | C33  | C34  | 118.9(5)  |
| C34  | C33  | C15  | 120.8(5)  |
| C11  | C10  | C27  | 118.0(4)  |
| C9   | C10  | C11  | 124.2(5)  |
| C9   | C10  | C27  | 117.8(5)  |
| C14  | C15  | C33  | 118.1(5)  |
| C16  | C15  | C33  | 117.1(5)  |
| C16  | C15  | C14  | 124.8(5)  |
| C33  | C38  | C37  | 120.4(5)  |
| C3   | C2   | C1   | 108.2(5)  |
| C21  | C26  | C25  | 120.7(5)  |
| C43A | C42  | P4   | 122.1(5)  |
| C43A | C42  | C41A | 118.0(6)  |
| C41A | C42  | P4   | 119.8(5)  |
| C43  | C42  | P4   | 125.3(11) |
| C43  | C42  | C41  | 120.3(15) |
| C41  | C42  | P4   | 113.6(10) |
| C13  | C12  | C11  | 107.9(5)  |
| C8   | C7   | C6   | 107.5(5)  |
| C31  | C32  | C27  | 121.4(5)  |
| C27  | C28  | C29  | 121.4(5)  |
| C24  | C23  | C22  | 121.7(5)  |
| C35  | C34  | C33  | 120.0(5)  |
| C21  | C22  | C23  | 120.3(5)  |
| N3   | C14  | C15  | 126.0(5)  |

| Atom | Atom | Atom | Angle    | Atom | Atom | Atom | Angle     |
|------|------|------|----------|------|------|------|-----------|
| N3   | C14  | C13  | 109.8(4) | N2   | C6   | C7   | 108.8(5)  |
| C15  | C14  | C13  | 124.1(5) | C5   | C6   | C7   | 123.9(5)  |
| C32  | C31  | C30  | 122.4(6) | C20  | C39  | C40  | 115.7(11) |
| C28  | C29  | C30  | 120.4(5) | C44A | C39  | C20  | 122.3(5)  |
| C7   | C8   | C9   | 107.8(5) | C44A | C39  | C40A | 119.4(6)  |
| C24  | C25  | C26  | 119.5(5) | C40A | C39  | C20  | 118.3(6)  |
| C18  | C17  | C16  | 107.0(5) | C44  | C39  | C20  | 128.2(13) |
| C17  | C18  | C19  | 108.1(5) | C44  | C39  | C40  | 114.6(16) |
| C42  | C43A | C44A | 121.4(7) | C12  | C13  | C14  | 106.7(5)  |
| C39  | C44A | C43A | 119.2(7) | C23  | C24  | P1   | 120.7(4)  |
| C39  | C40A | C41A | 120.2(7) | C23  | C24  | C25  | 119.0(5)  |
| C40A | C41A | C42  | 120.9(7) | C25  | C24  | P1   | 120.2(4)  |
| C2   | C3   | C4   | 106.9(5) | N2   | C9   | C10  | 126.4(5)  |
| N4   | C16  | C15  | 125.1(5) | N2   | C9   | C8   | 108.6(5)  |
| N4   | C16  | C17  | 109.3(5) | C10  | C9   | C8   | 125.0(5)  |
| C15  | C16  | C17  | 125.4(5) | C46  | N5   | C45  | 112.5(5)  |
| C36  | C35  | C34  | 121.1(5) | C47  | N6   | C48  | 113.2(5)  |
| C31  | C30  | P2   | 121.3(4) | C41  | C40  | C39  | 120(2)    |
| C31  | C30  | C29  | 117.1(5) | C39  | C44  | C43  | 125(2)    |
| C29  | C30  | P2   | 121.6(4) | C42  | C43  | C44  | 120(2)    |
| N2   | C6   | C5   | 127.1(5) | C40  | C41  | C42  | 117(2)    |

**Table S4.** Hydrogen Bond information for (Me<sub>2</sub>NH<sub>2</sub>)<sub>2</sub>[Pd(TPPP-A)<sub>2</sub>H].

| D   | H   | A                | d(D-H)/Å | d(H-A)/Å | d(D-A)/Å | D-H-A/deg |
|-----|-----|------------------|----------|----------|----------|-----------|
| O3  | H3  | O11 <sup>1</sup> | 0.84     | 1.67     | 2.500(5) | 169.6     |
| O8  | H8  | O5 <sup>2</sup>  | 0.84     | 1.78     | 2.450(6) | 135.8     |
| O7  | H7  | O1 <sup>3</sup>  | 0.84     | 1.70     | 2.513(5) | 161.5     |
| O6  | H6  | O10 <sup>4</sup> | 0.84     | 1.78     | 2.540(6) | 149.8     |
| O12 | H12 | O2 <sup>2</sup>  | 0.84     | 1.77     | 2.534(6) | 151.0     |
| N5  | H5A | O4 <sup>5</sup>  | 0.91     | 1.79     | 2.700(6) | 173.7     |
| N5  | H5B | O10 <sup>6</sup> | 0.91     | 1.86     | 2.750(6) | 164.1     |
| N6  | H6A | O1               | 0.91     | 1.83     | 2.733(6) | 169.7     |
| N6  | H6B | O2 <sup>7</sup>  | 0.91     | 1.90     | 2.769(6) | 160.0     |

<sup>1</sup>-1+x,1+y,+z; <sup>2</sup>1+x,-1+y,+z; <sup>3</sup>1+x,-1+y,1+z; <sup>4</sup>-1+x,+y,1+z; <sup>5</sup>1+x,+y,-1+z; <sup>6</sup>2-x,1-y,-z; <sup>7</sup>1-x,2-y,-z

**Table S5.** Atomic Occupancies for all atoms that are not fully occupied in (Me<sub>2</sub>NH<sub>2</sub>)<sub>2</sub>[Pd(TPPP-A)<sub>2</sub>H].

| Atom | Occupancy | Atom | Occupancy | Atom | Occupancy | Atom | Occupancy |
|------|-----------|------|-----------|------|-----------|------|-----------|
| C43A | 0.734(10) | C40A | 0.734(10) | H40  | 0.266(10) | C41  | 0.266(10) |
| H43A | 0.734(10) | H40A | 0.734(10) | C44  | 0.266(10) | H41  | 0.266(10) |
| C44A | 0.734(10) | C41A | 0.734(10) | H44  | 0.266(10) |      |           |
| H44A | 0.734(10) | H41A | 0.734(10) | C43  | 0.266(10) |      |           |
|      |           | C40  | 0.266(10) | H43  | 0.266(10) |      |           |

**Table S6.** Solvent masking (PLATON/SQUEEZE) information for (Me<sub>2</sub>NH<sub>2</sub>)<sub>2</sub>[Pd(TPPP-A)<sub>2</sub>H].

| No | x      | y     | z     | V     | e     | Content |
|----|--------|-------|-------|-------|-------|---------|
| 1  | -0.527 | 0.000 | 0.500 | 777.2 | 318.3 | 8C3H7NO |

#### 4. Electrochemical and spectroelectrochemical studies

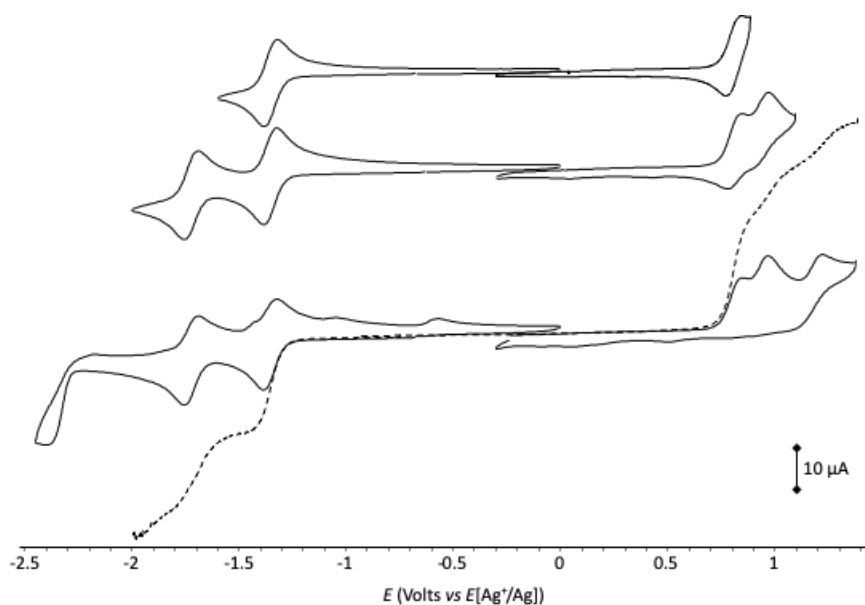

**Figure S4.** Cyclic voltammograms recorded with H<sub>2</sub>(TPPP) (1mM in MeCN + TBAP (0.1 M), vitreous carbon working electrode ( $\varnothing = 3$  mm),  $\nu = 0.1 \text{ V s}^{-1}$ ,  $E$  vs  $[\text{Ag}^+(0.01\text{M})/\text{Ag}]$ ).

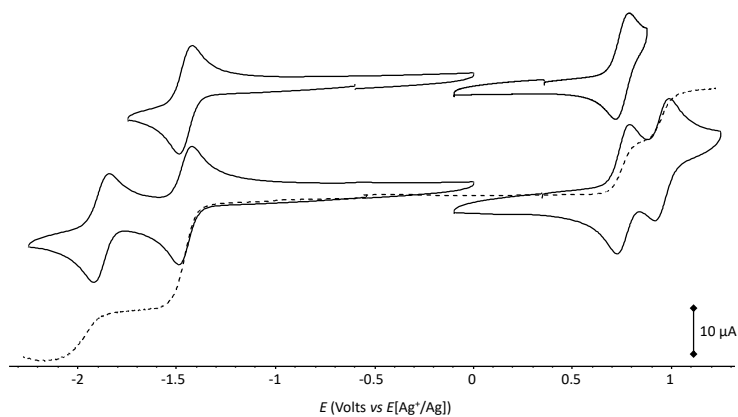

**Figure S5.** Cyclic voltammograms recorded with Cu(TPPP) (1mM in MeCN + TBAP (0.1 M), vitreous carbon working electrode ( $\varnothing = 3$  mm),  $\nu = 0.1 \text{ V s}^{-1}$ ,  $E$  vs  $[\text{Ag}^+(0.01\text{M})/\text{Ag}]$ ).

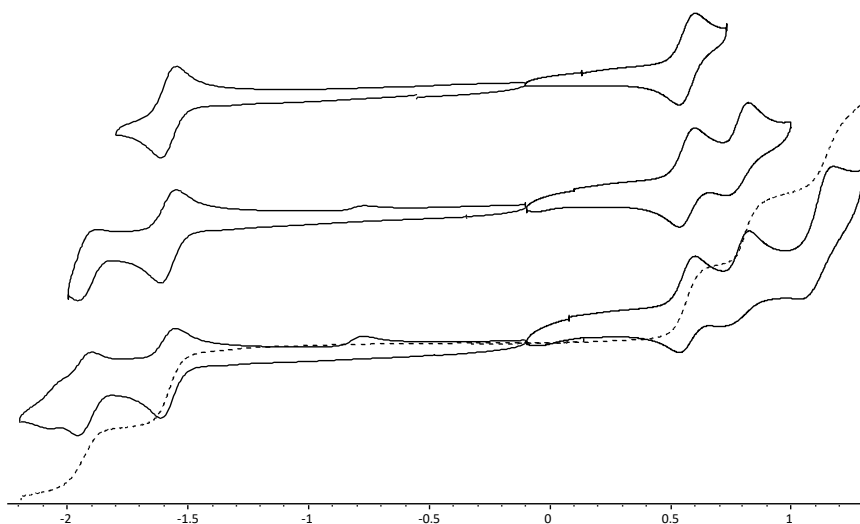

**Figure S6.** Cyclic voltamograms recorded with Zn(TPPP) (1mM in MeCN + TBAP (0.1 M), vitreous carbon working electrode ( $\varnothing = 3$  mm),  $\nu = 0.1$  V s<sup>-1</sup>,  $E$  vs [Ag<sup>+</sup>(0.01M)/Ag]).

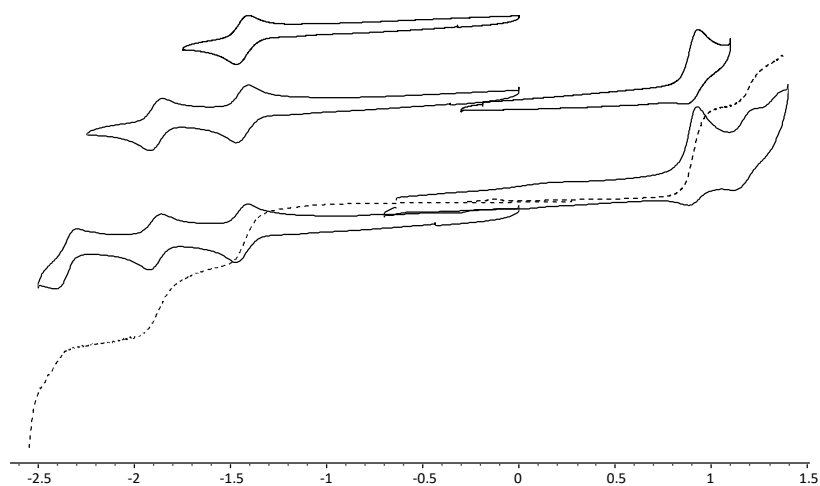

**Figure S7.** Cyclic voltamograms recorded with Pd(TPPP) (1mM in MeCN + TBAP (0.1 M), vitreous carbon working electrode ( $\varnothing = 3$  mm),  $\nu = 0.1$  V s<sup>-1</sup>,  $E$  vs [Ag<sup>+</sup>(0.01M)/Ag]).

A

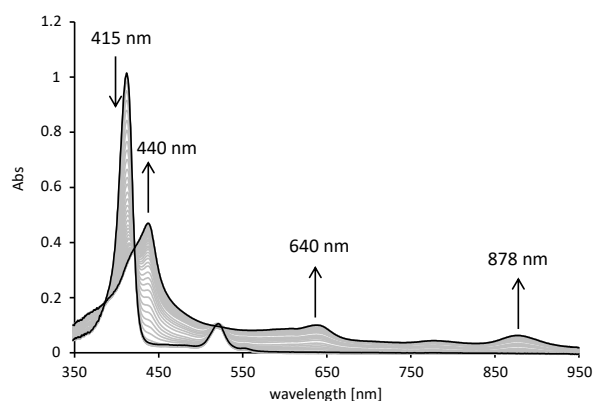

B

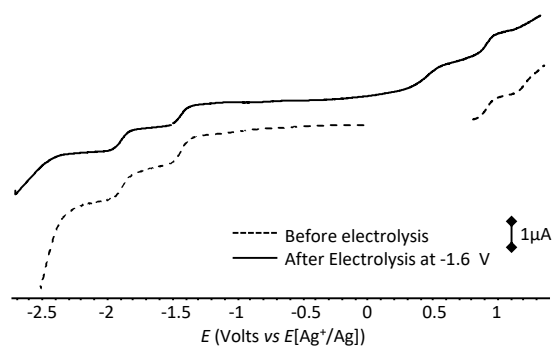

**Figure S8.** (A) UV-vis-NIR spectra recorded during the exhaustive one-electron reduction of Pd(TPPP) ( $2.4 \cdot 10^{-5}$  M) in MeCN (0.1 M TBAP, working electrode: Pt, 10 mL,  $E_{app} = -1.6$  V,  $l = 1$  mm,  $t \approx 30$  min). (B) Rotatory disk electrode measurements carried out before (dashed line) and after (solid line) the first one-electron reduction of Pd(TPPP) at  $E_{app} = -1.6$  V (RDE,  $10 \text{ m} \cdot \text{s}^{-1}$ , 500 r/min).

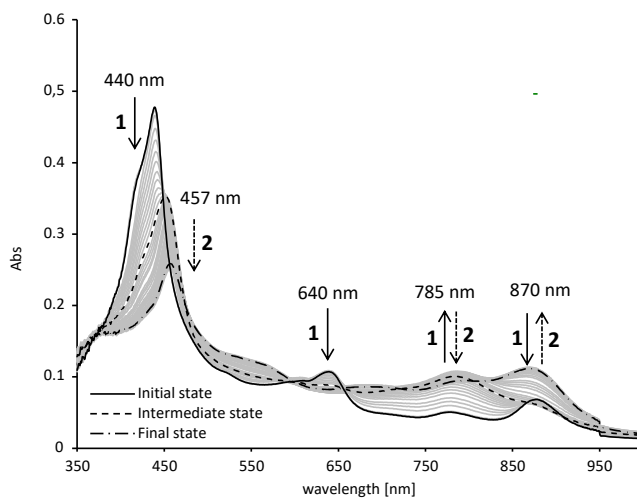

**Figure S9.** UV-vis-NIR spectra recorded during two consecutive reductions waves of Pd(TPPP) ( $2.4 \cdot 10^{-5}$  M) in MeCN (0.1 M TBAP, working electrode: Pt, 10 mL,  $E_{app} = -2.15$  V,  $l = 1$  mm,  $t \approx 30$  min).

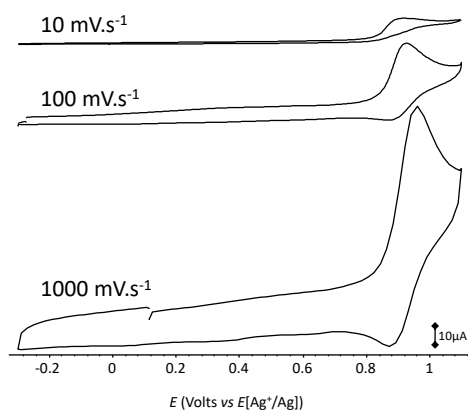

**Figure S10.** Cyclic voltamograms of Pd(TPPP) recorded at 10, 100 and 1000  $\text{mV s}^{-1}$  (1 mM in MeCN + TBAP (0.1 M), vitreous carbon working electrode ( $\varnothing = 3 \text{ mm}$ ),  $E$  vs  $[\text{Ag}^+(0.01\text{M})/\text{Ag}]$ ).

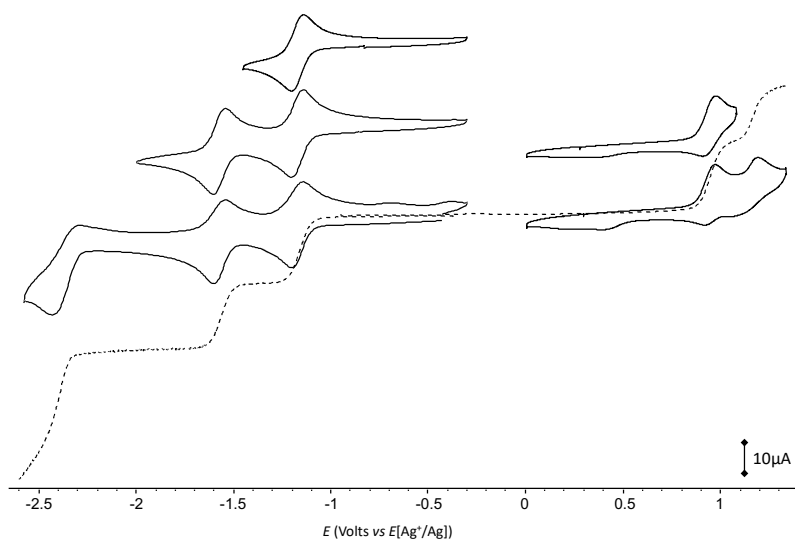

**Figure S11.** Cyclic voltamograms recorded with In(TPPP) (1 mM in MeCN + TBAP (0.1 M), vitreous carbon working electrode ( $\varnothing = 3 \text{ mm}$ ),  $\nu = 0.1 \text{ V s}^{-1}$ ,  $E$  vs  $[\text{Ag}^+(0.01\text{M})/\text{Ag}]$ ).

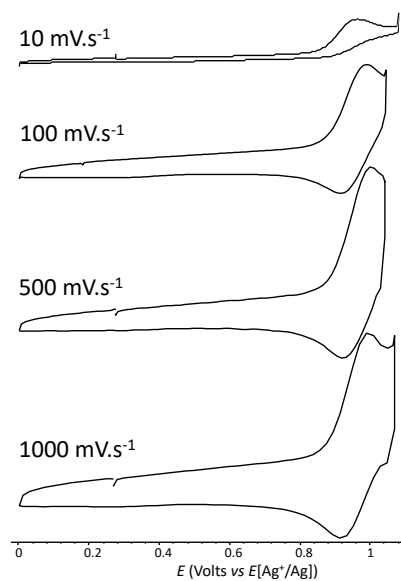

**Figure S12.** Cyclic voltamograms of In(TPPP) recorded at 10, 100, 500 and 1000 mV s<sup>-1</sup> (1mM in MeCN + TBAP (0.1 M), vitreous carbon working electrode ( $\varnothing = 3$  mm),  $E$  vs  $[\text{Ag}^+(0.01\text{M})/\text{Ag}]$ ).

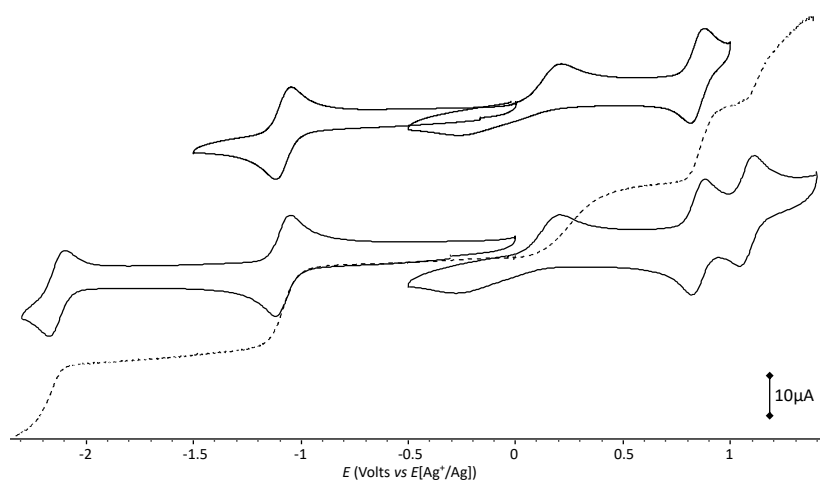

**Figure S13.** Cyclic voltamograms recorded with Co(TPPP) (1mM in MeCN + TBAP (0.1 M), vitreous carbon working electrode ( $\varnothing = 3$  mm),  $\nu = 0.1$  V s<sup>-1</sup>,  $E$  vs  $[\text{Ag}^+(0.01\text{M})/\text{Ag}]$ ).

## 5. Studies of optical properties

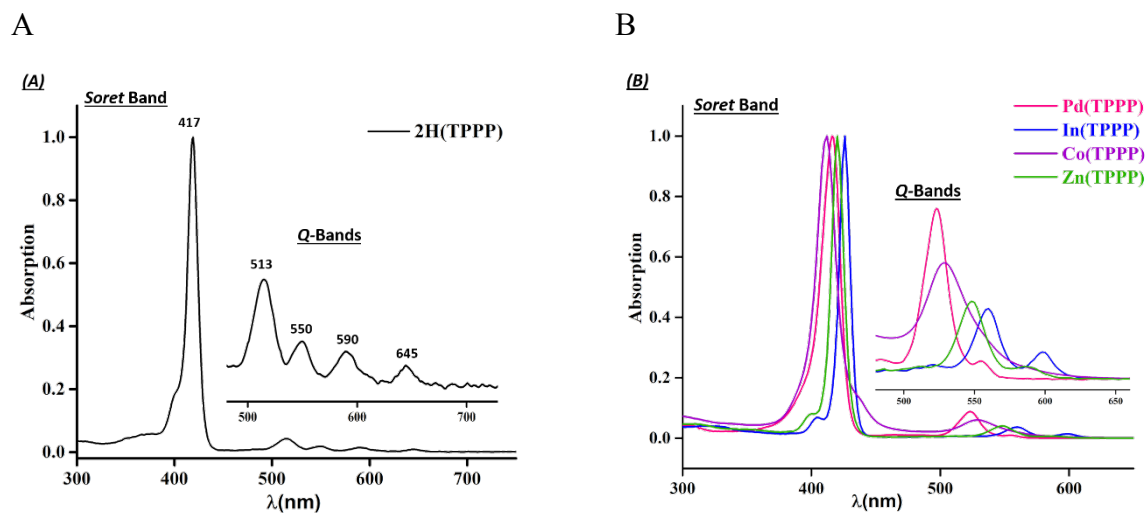

**Figure S14.** UV-vis spectra of  $H_2(TPPP)$  (A) and  $M(TPPP)$  ( $M = Zn, Pd, Co$  and  $In$ ) (B) in dichloromethane ( $c = 1 \mu M$ ) at room temperature.

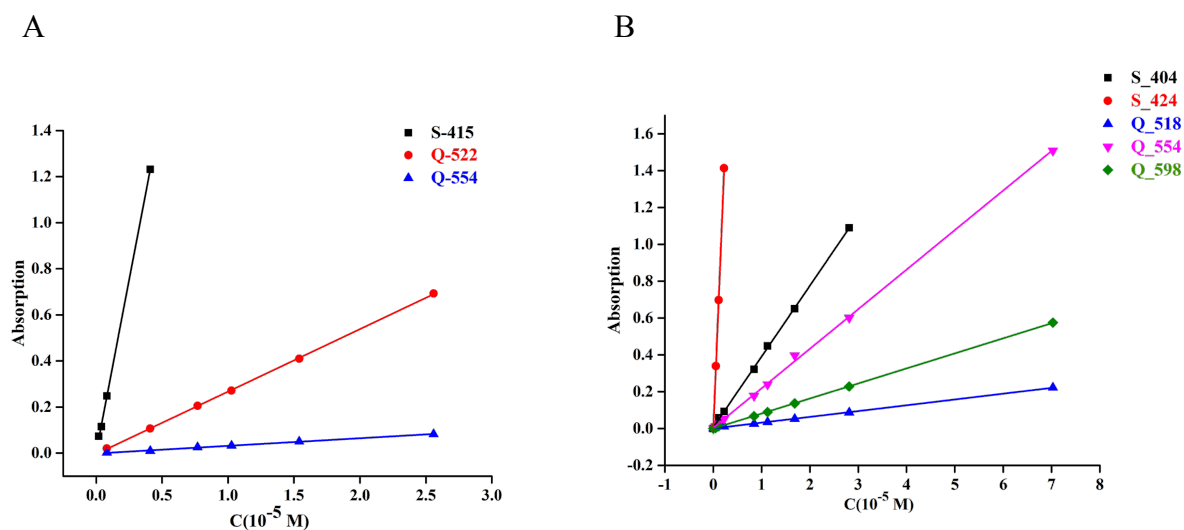

**Figure S15.** Beer-Lambert's law plots for  $Pd(TPPP)$  (A) and  $In(TPPP)$  (B) in  $CH_2Cl_2$  at room temperature for different absorption bands. The corresponding  $\lambda_{max}$  values are indicated in the legend.



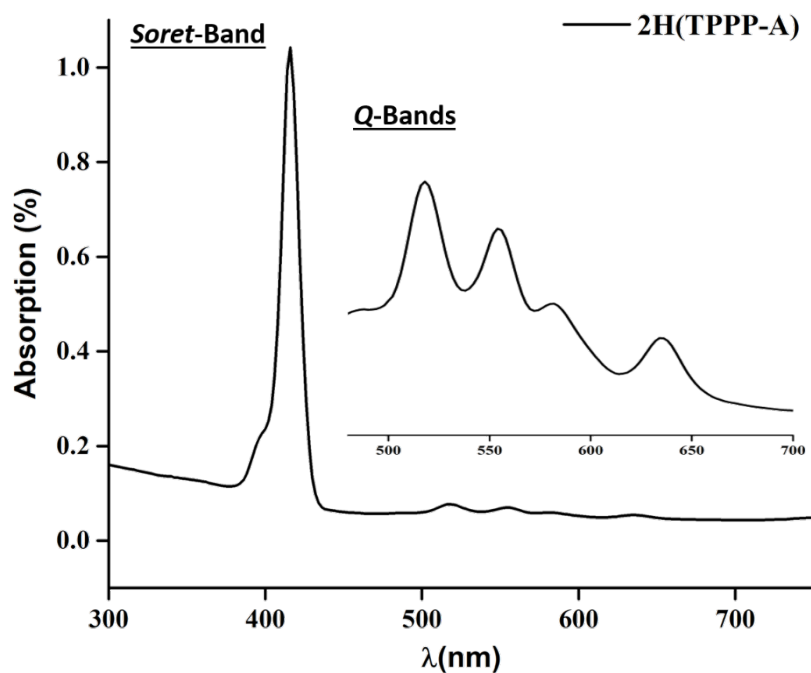

**Figure S16.** UV-vis spectrum of  $H_2(TPPP-A)$  in water ( $c = 1 \mu M$ , 1 drop of 0.1 M NaOH).

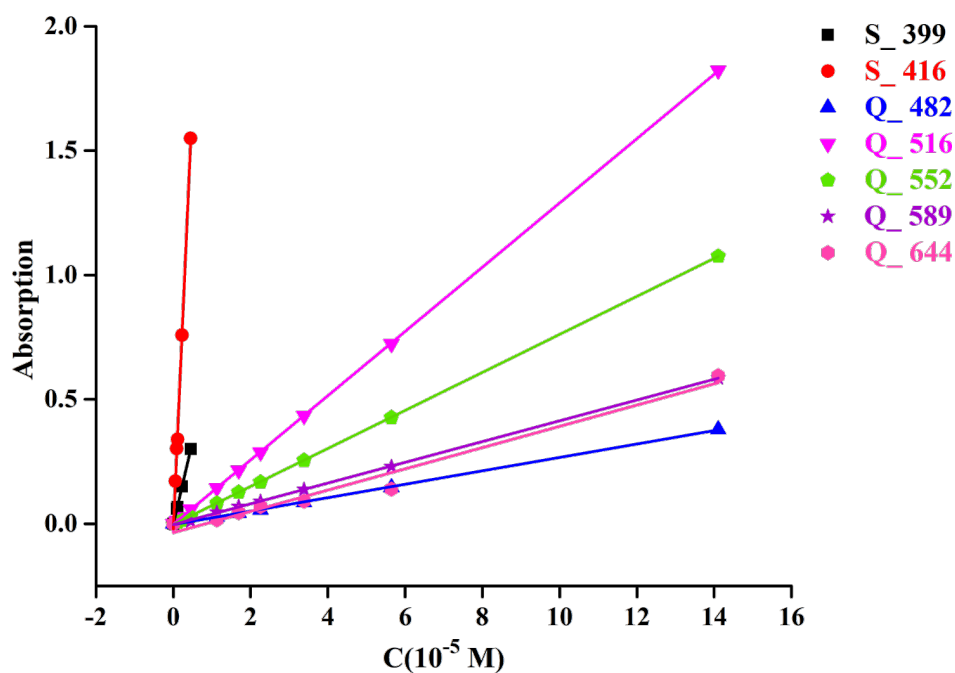

**Figure S17.** Beer-Lambert's law plots for  $H_2(TPPP-A)$  in water ( $c = 1 \mu M$ , 1 drop of 0.1 M NaOH). The corresponding  $\lambda_{max}$  values are indicated in the legend.

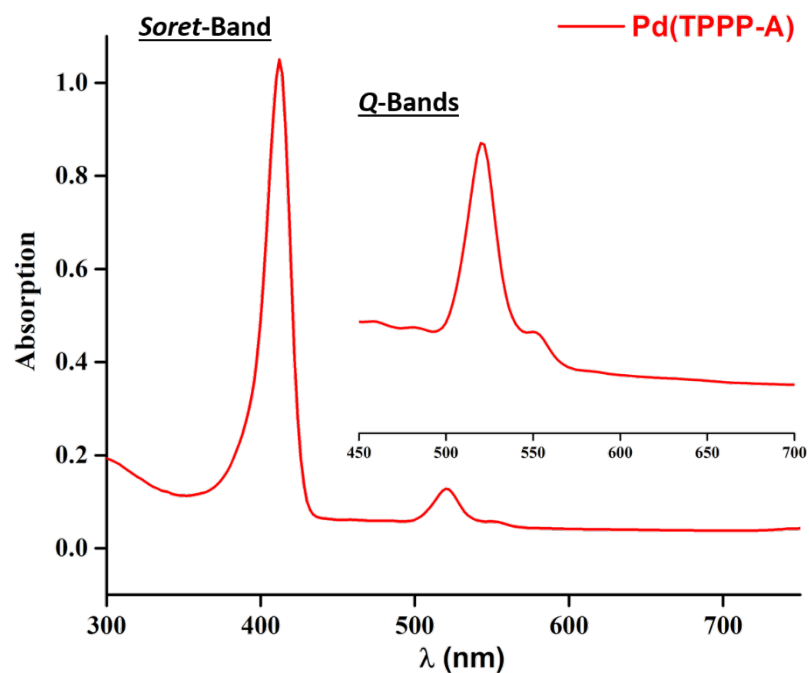

**Figure S18.** UV-vis spectrum of Pd(TPPP-A) in water ( $c = 1 \mu\text{M}$ , 1 drop of 0.1 M NaOH).

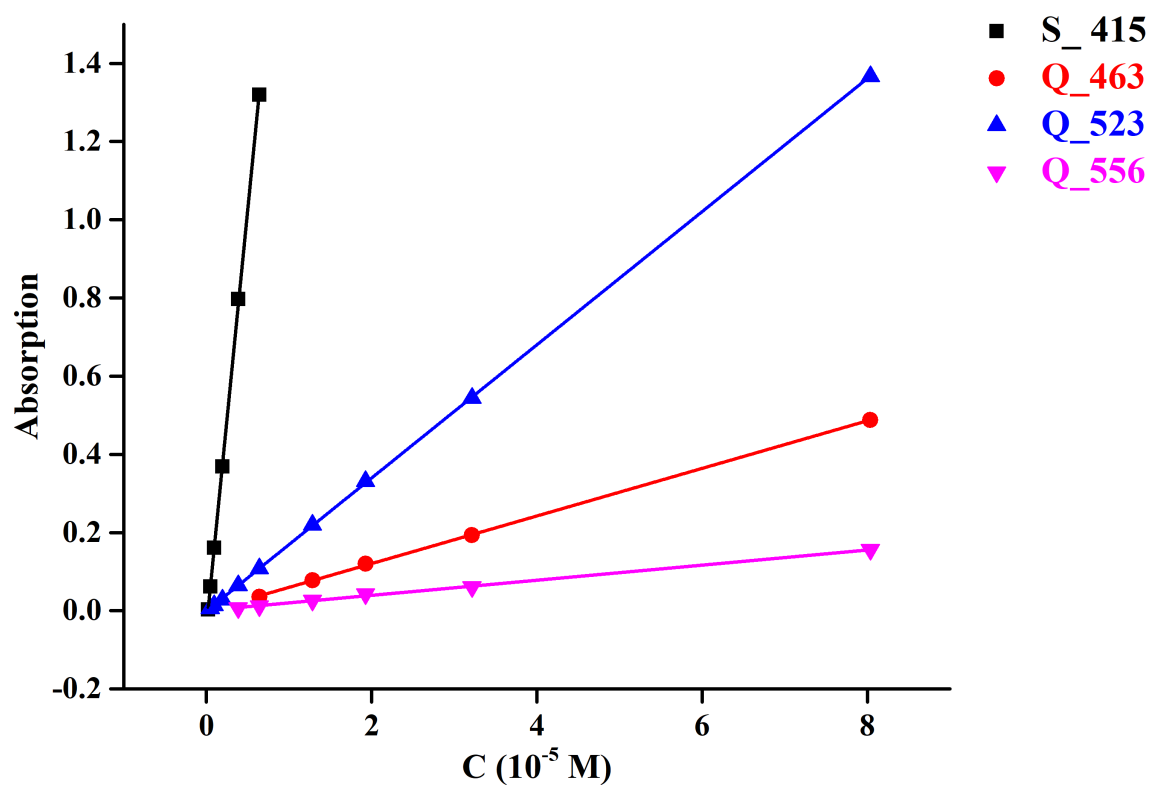

**Figure S19.** Beer-Lambert's law plots for Pd(TPPP-A) in MeCN/H<sub>2</sub>O (1:1 v/v;  $c = 0.01 \text{ mM}$ ).at room temperature. The corresponding  $\lambda_{\text{max}}$  values are indicated in the legend.

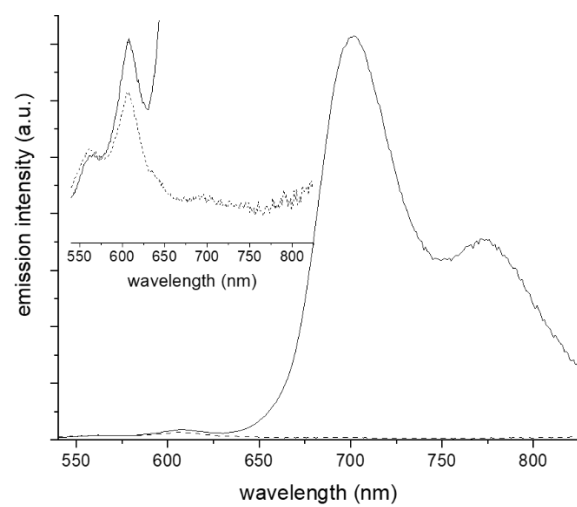

**Figure S20.** Emission spectra (solid for deoxygenated sample and dashed for oxygen-containing sample) for Pd(TPPP-A) in basified MeCN/H<sub>2</sub>O (1:1 v/v) solution.

## 6. Photostability studies

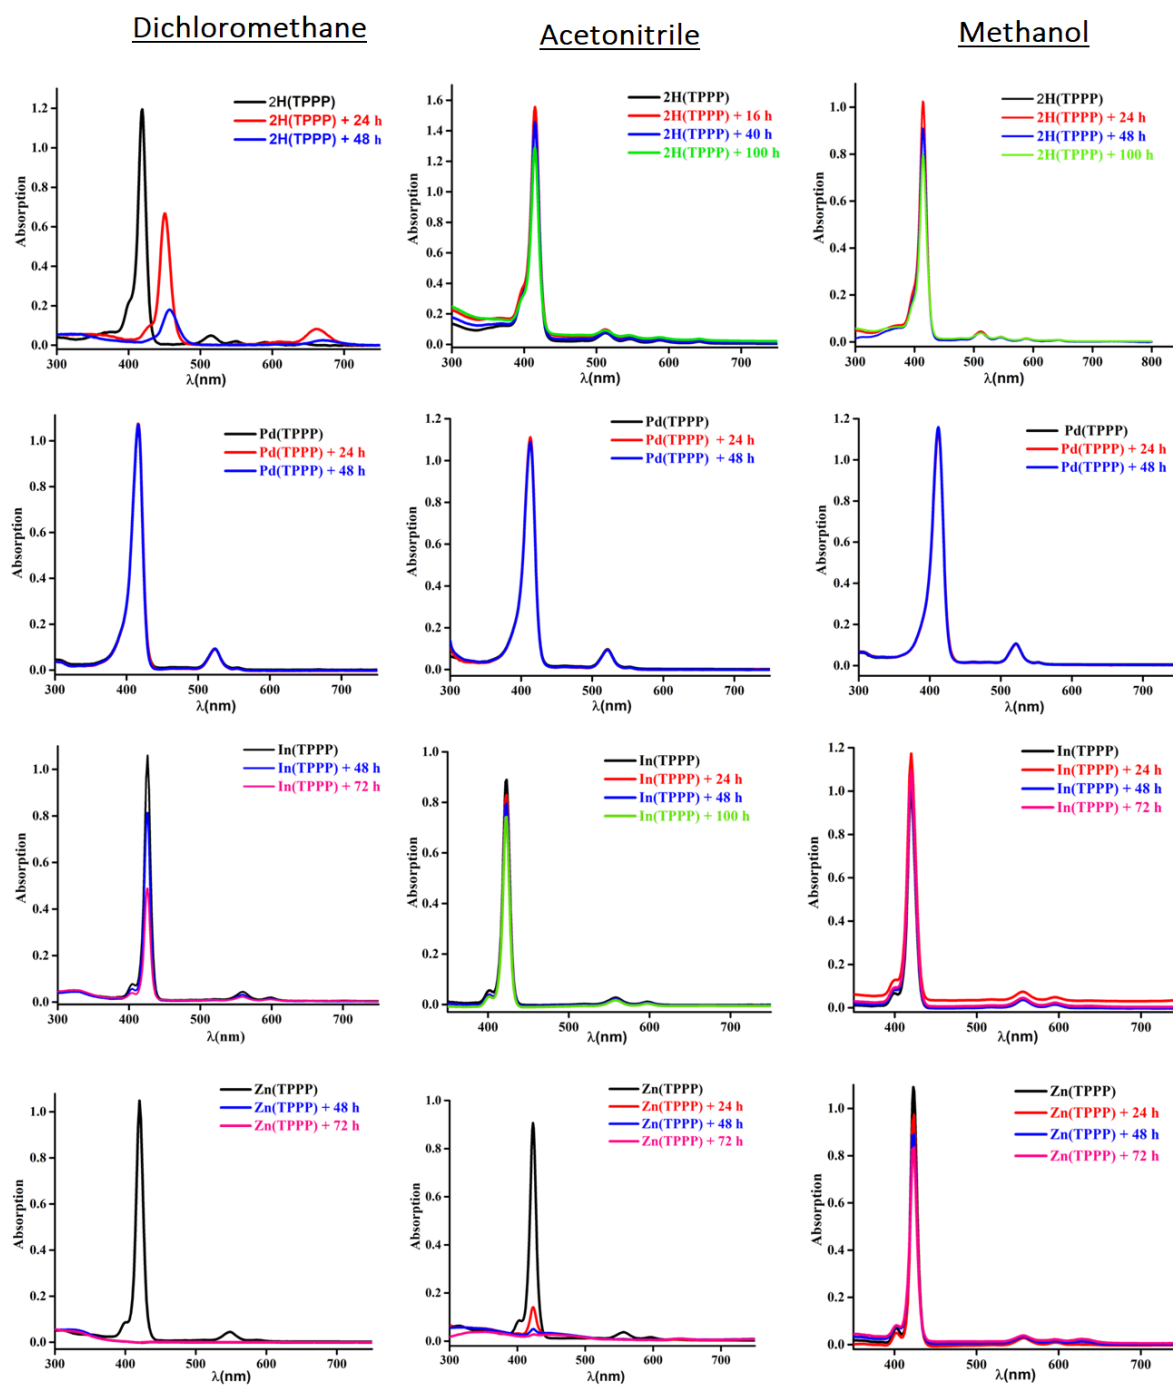

**Figure S21.** Evolution of the UV-vis spectra of H<sub>2</sub>(TPPP), Pd(TPPP), In(TPPP), and Zn(TPPP) in dichloromethane, acetonitrile, and methanol under irradiation with a blue LED (3 W).

## 7. Studies on the single oxygen generation

The photophysical measurements were carried out in CD<sub>3</sub>CN/D<sub>2</sub>O (10:1 v/v) by direct detection of the singlet oxygen phosphorescence signal at 1270 nm. Deuterated solvents were chosen here, as they ensure that singlet oxygen lifetime is long enough to enable detection and quantitative evaluation of its phosphorescence signal with enough accuracy and high signal-to-noise ratio. Measurements were performed upon irradiation in the Soret band of porphyrins (at *ca* 415 nm), first to match the conditions of the catalytic experiments, all performed under blue light irradiation, second to enable a systematic comparison with phenalen-1-one (perinaphthenone, **PH**) which was used as a standard.

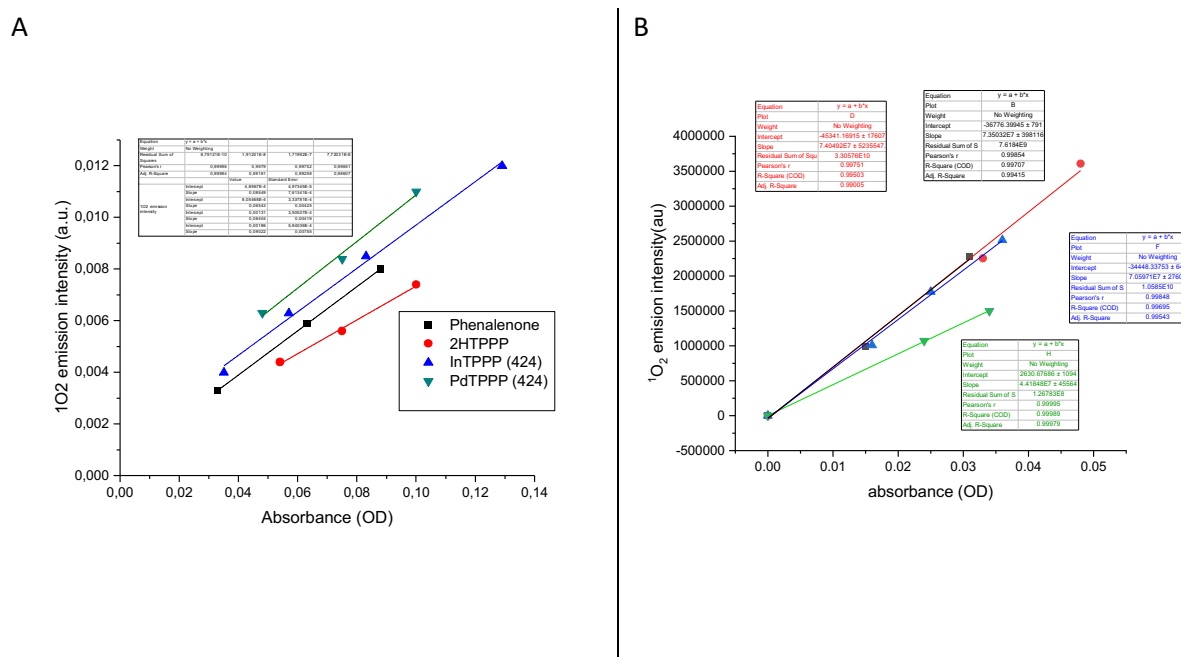

**Figure S22.** (A) Plot of the <sup>1</sup>O<sub>2</sub> emission intensity vs absorbance of CD<sub>3</sub>CN/D<sub>2</sub>O solutions for phenalen-1-one (**PH**) (black squares), H<sub>2</sub>(TPPP) (red circles) In(TPPP) (blue triangles) and Pd(TPPP) (green triangles). Linear fits, with the respective color code. (B) Plot of the <sup>1</sup>O<sub>2</sub> emission intensity vs absorbance of CDCl<sub>3</sub> solutions for phenalene (black squares) PdTPPP (red circles) InTPPP (blue triangles) and H<sub>2</sub>(TPPP) (green triangles). Linear fits, with the respective color code. Phenalene taken as a reference ( $\phi_{\Delta}$  = 0.97 in chloroform) gives values for PdTPPP  $\phi_{\Delta}$  = 0.97; for InTPPP  $\phi_{\Delta}$  = 0.93; for H<sub>2</sub>(TPPP)  $\phi_{\Delta}$  = 0.58).

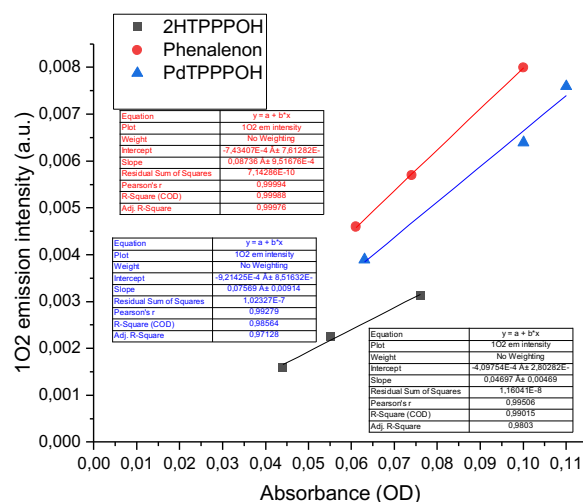

**Figure S23.** Plot of the  $^{102}\text{O}_2$  emission intensity vs absorbance of  $\text{CD}_3\text{CN}/\text{D}_2\text{O}$  (1:1 v/v) solutions for phenalen-1-one (PH) (red circles),  $\text{H}_2(\text{TPPP})$  (black squares) and  $\text{Pd}(\text{TPPP})$  (blue triangles). Linear fits, with the respective color code.

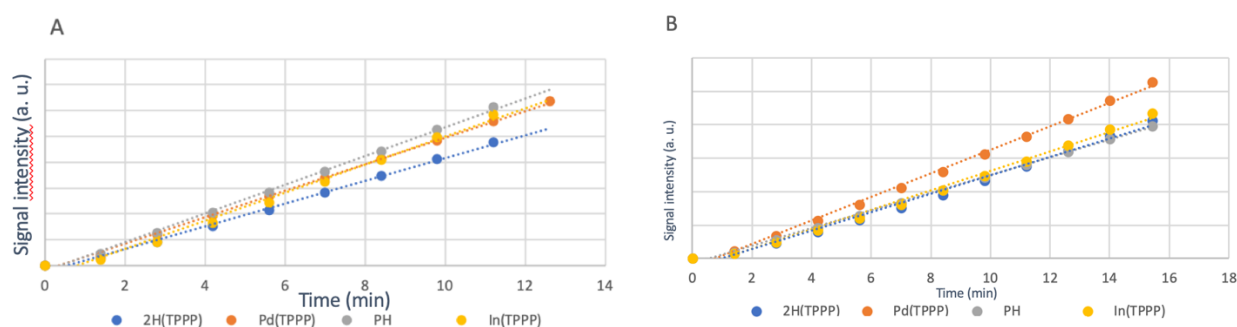

**Figure S24.** Kinetics of TEMPO generation in the presence of  $\text{H}_2(\text{TPPP})$ ,  $\text{Pd}(\text{TPPP})$ ,  $\text{In}(\text{TPPP})$  and phenalen-1-one (PH) in MeCN (A) and MeCN-H<sub>2</sub>O (10:1 v/v) solutions (B).

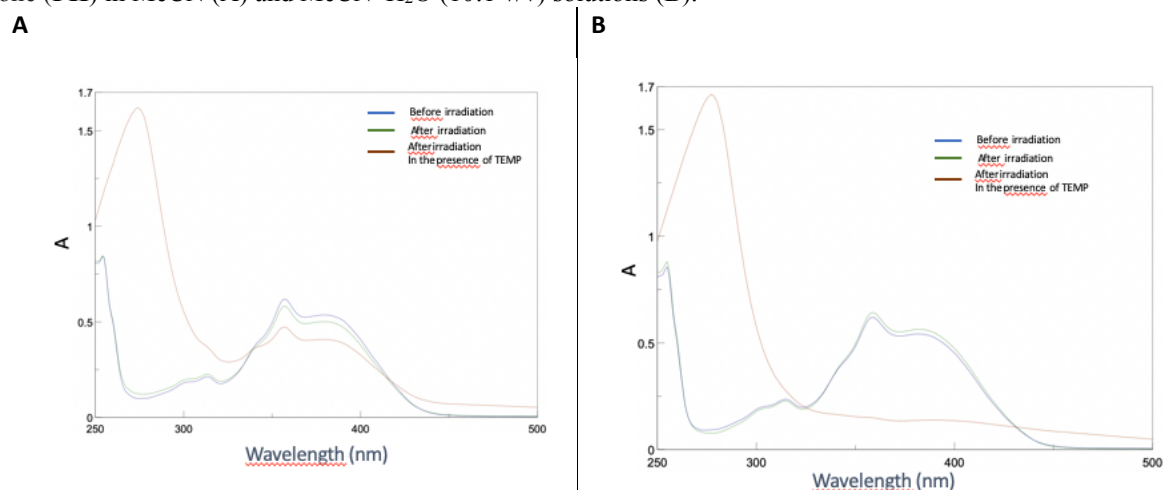

**Figure S25.** UV-vis absorption spectra of phenalen-1-one (PH) in MeCN (A) and MeCN/H<sub>2</sub>O (10:1 v/v) (B) before and after irradiation at 365 nm (EvoluChem®, 30 W, AC-200) in HepatoChem® photoreactor for 1 h in the presence and in the absence of TEMP.

## 8. DFT calculations

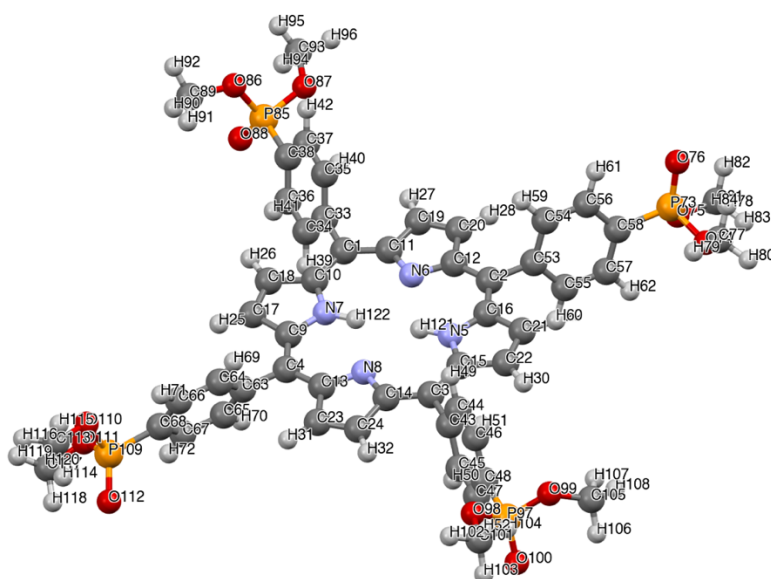

**Figure S26.** The structure of H<sub>2</sub>(TPPP-Me) complex obtained by full geometry optimization at B3LYP/Jorge-DZP level.

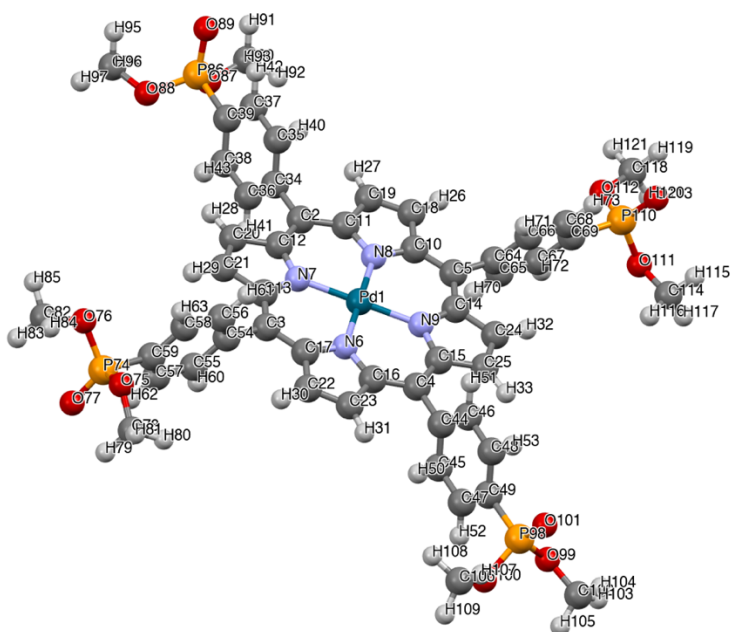

**Figure S27.** The structure of Pd(TPPP-Me) complex obtained by full geometry optimization at B3LYP/Jorge-DZP level.

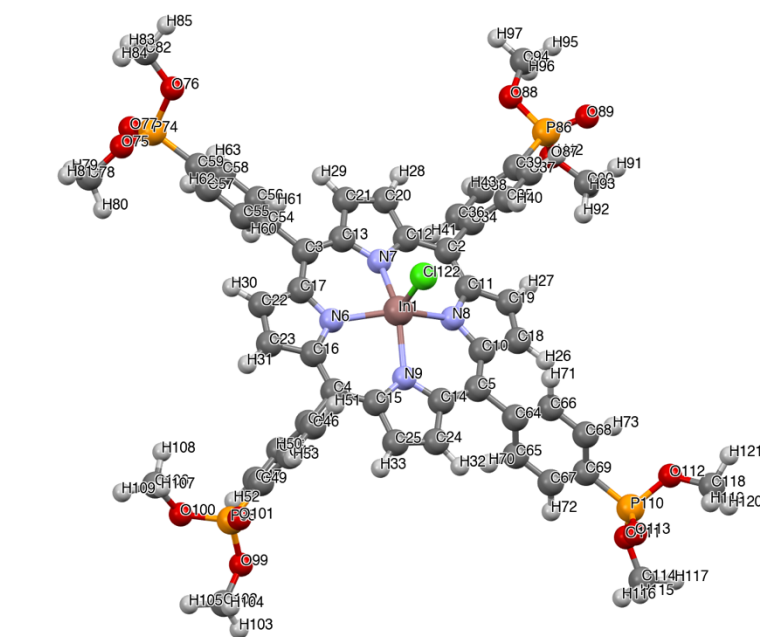

**Figure S28.** The structure of In(TPPP-Me) complex obtained by full geometry optimization at B3LYP/Jorge-DZP level.

**Table S7.** Selected bonds lengths (Å) and angles (°) in M(TPPP-Me) (M = H<sub>2</sub>, Pd, In) obtained by full geometry optimization at B3LYP/Jorge-DZP level.

| Compound                 | M–N             | P=O   | P–O             | P–C   | C–C(Ph)     | N4–M <sup>a</sup> | N4/Ph<br>dihedral<br>angles |
|--------------------------|-----------------|-------|-----------------|-------|-------------|-------------------|-----------------------------|
| H <sub>2</sub> (TPPP-Me) | -               | 1.500 | 1.630–<br>1.648 | 1.811 | 1.397–1.406 | -                 | 70.54                       |
|                          |                 |       |                 |       |             |                   | 70.54                       |
|                          |                 |       |                 |       |             |                   | 71.48                       |
|                          |                 |       |                 |       |             |                   | 71.48                       |
| Pd(TPPP-Me)              | 1.980           | 1.500 | 1.630–<br>1.648 | 1.812 | 1.397–1.406 | 0                 | 76.98                       |
|                          |                 |       |                 |       |             |                   | 82.06                       |
|                          |                 |       |                 |       |             |                   | 84.60                       |
|                          |                 |       |                 |       |             |                   | 86.23                       |
| In(TPPP-Me) <sup>b</sup> | 2.155–<br>2.168 | 1.500 | 1.630-1.648     | 1.812 | 1.397–1.406 | 0.630             | 68.31                       |
|                          |                 |       |                 |       |             |                   | 74.39                       |
|                          |                 |       |                 |       |             |                   | 80.51                       |
|                          |                 |       |                 |       |             |                   | 80.51                       |

<sup>a</sup> Deviation of metal atom from the mean plane of N atoms; <sup>b</sup> In–Cl = 2.372 Å.



## 9. Spectral characterization of M(TPPP) and M(TPPP-A)

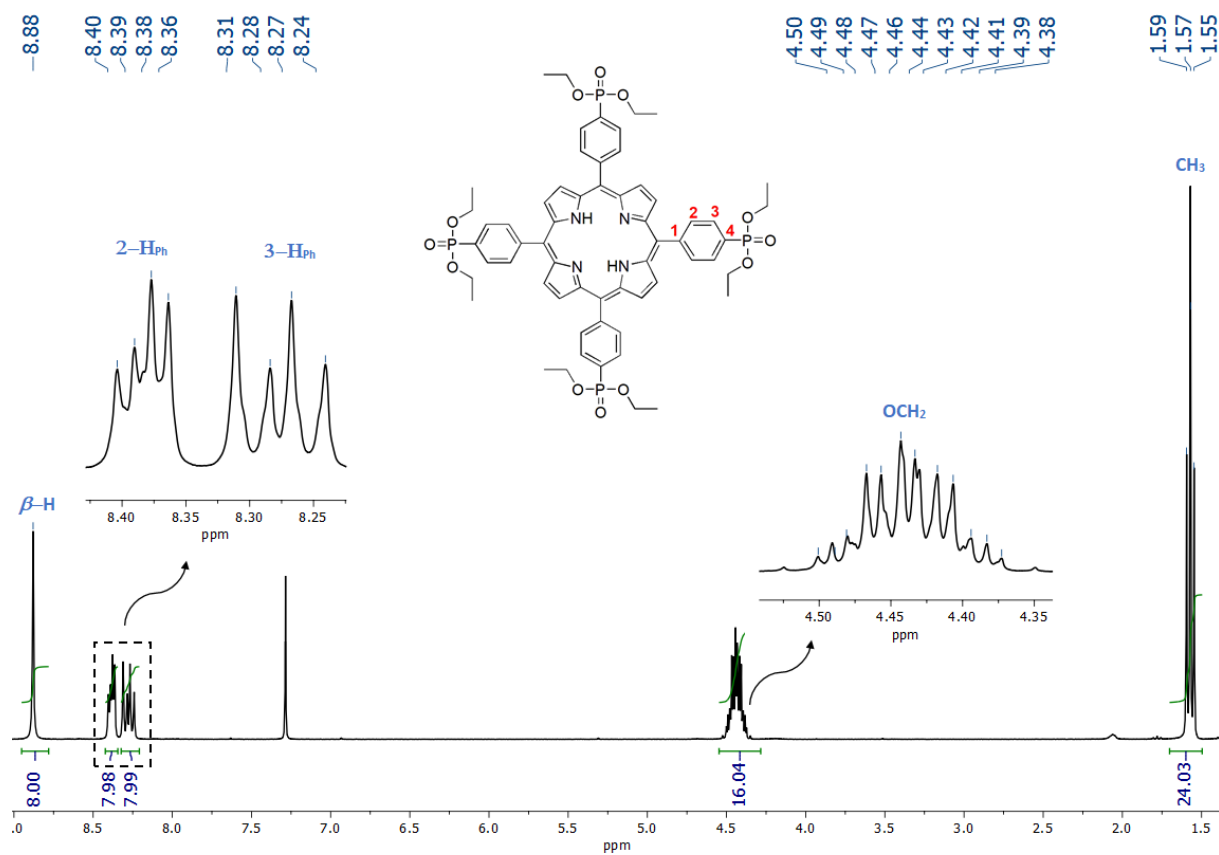

**Figure S29.**  $^1H$  NMR spectrum of  $H_2(TPPP)$  (300 MHz,  $CDCl_3$ , 298 K).

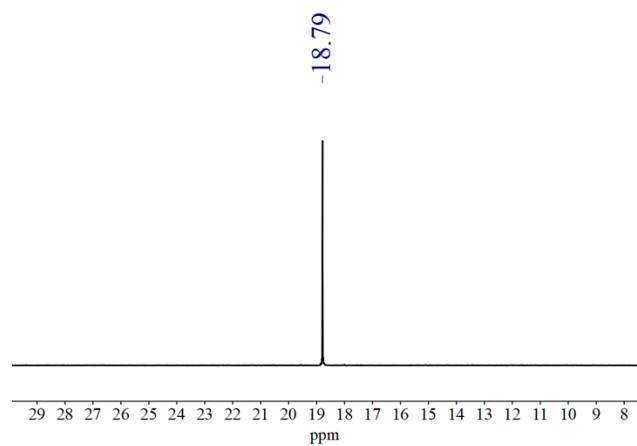

**Figure S30.**  $^{31}P\{^1H\}$  NMR spectrum of  $H_2(TPPP)$  (121 MHz,  $CDCl_3$ , 298 K).

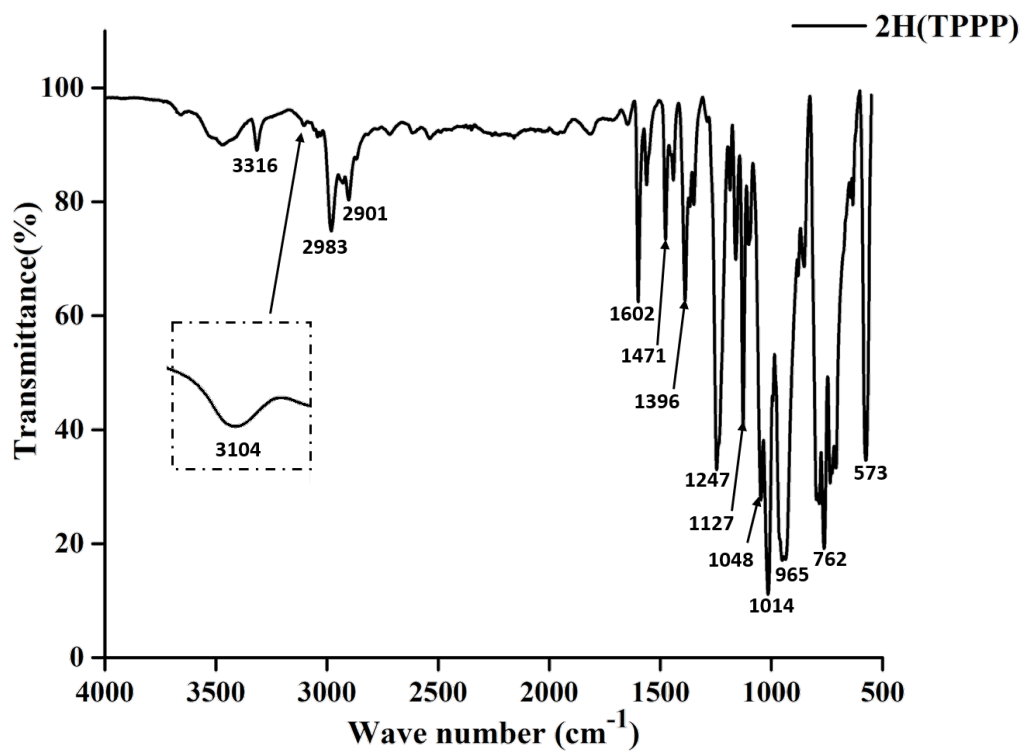

Figure S31. FT-IR spectrum of H<sub>2</sub>(TPPP) (neat).

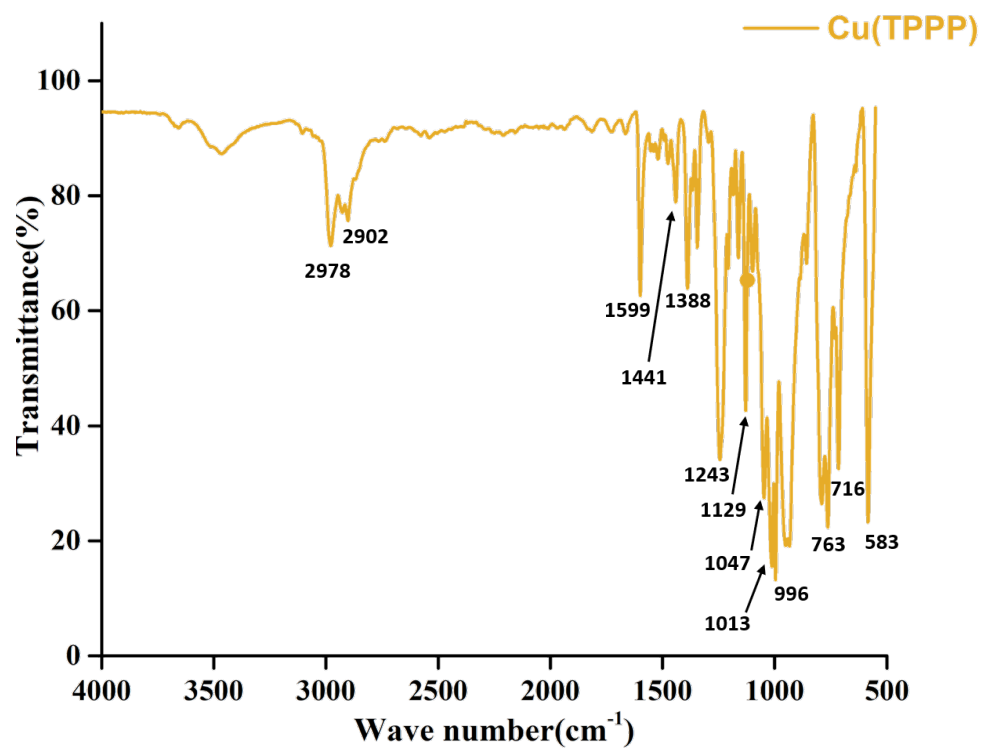

Figure S32. FT-IR spectrum of Cu(TPPP) (neat).

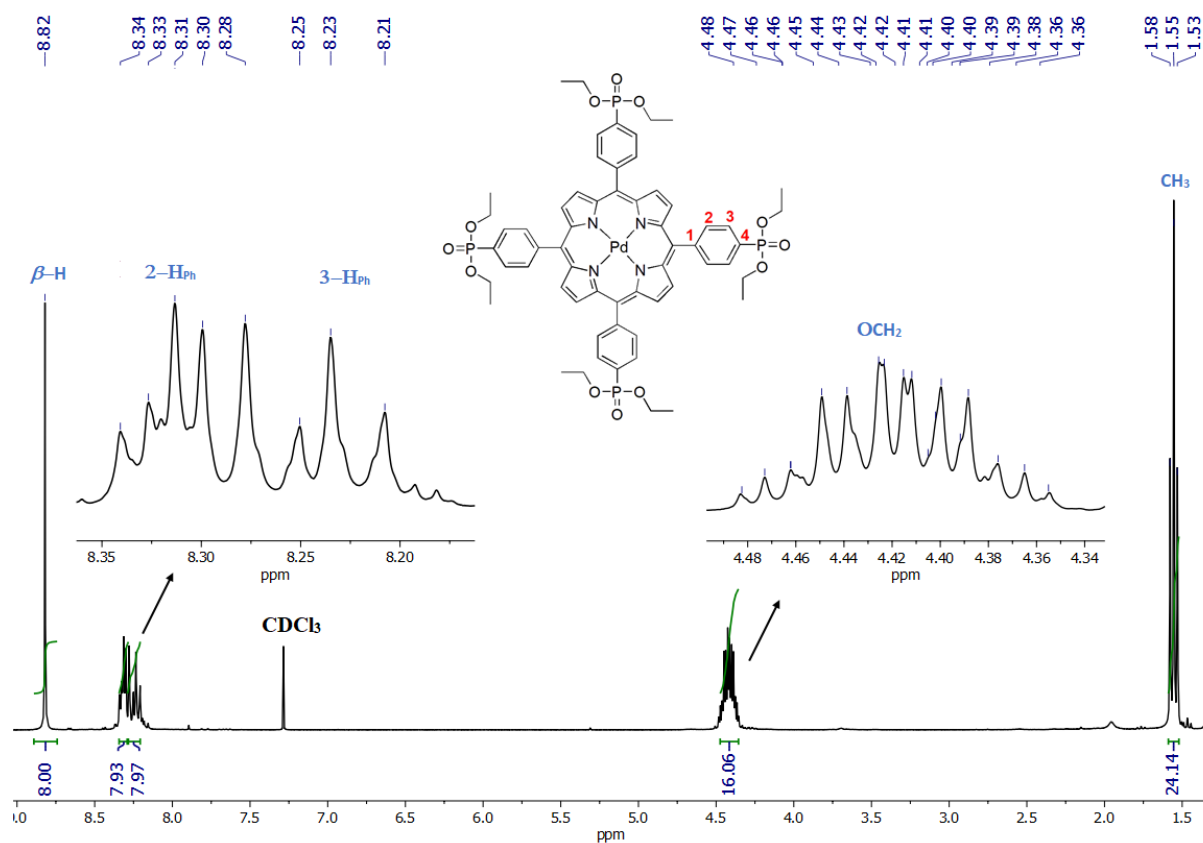

**Figure S33.** <sup>1</sup>H NMR spectrum of Pd(TPPP) (300 MHz, CDCl<sub>3</sub>, 298 K).

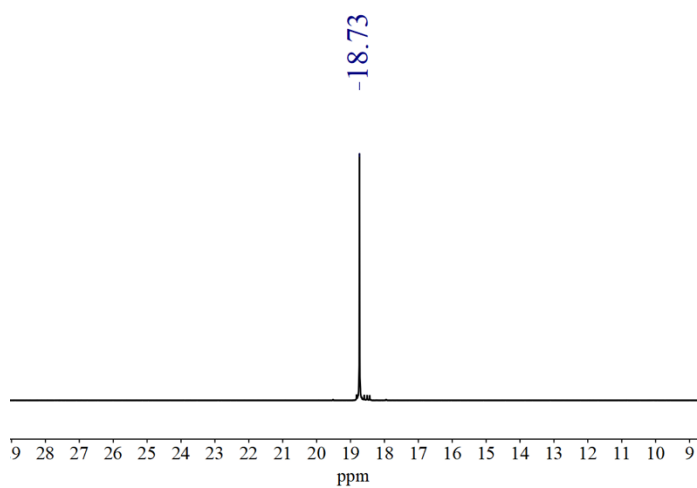

**Figure S34.** <sup>31</sup>P{<sup>1</sup>H} NMR spectrum of Pd(TPPP) (121 MHz, CDCl<sub>3</sub>, 298 K).

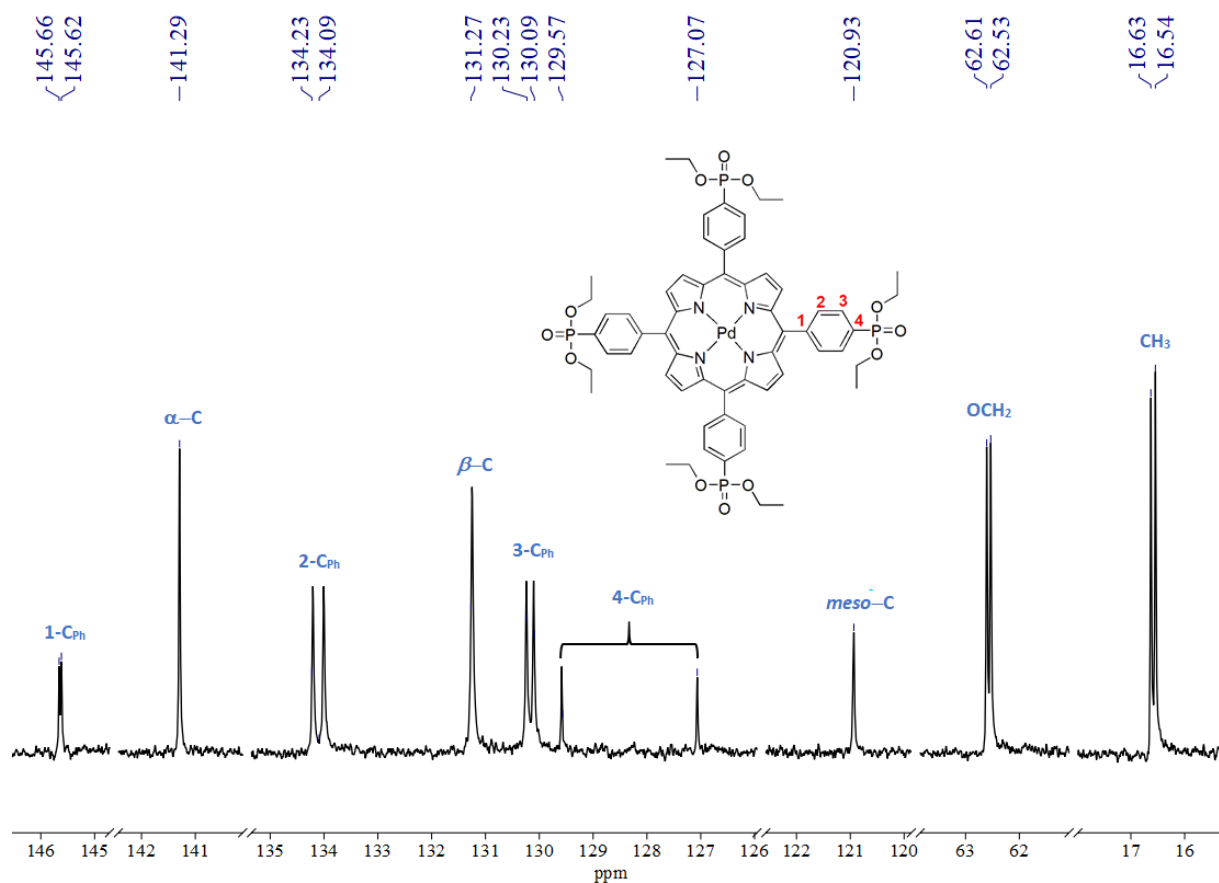

Figure S35.  $^{13}\text{C}\{^1\text{H}\}$  NMR spectrum of Pd(TPPP) (75 MHz,  $\text{CDCl}_3$ , 298 K).

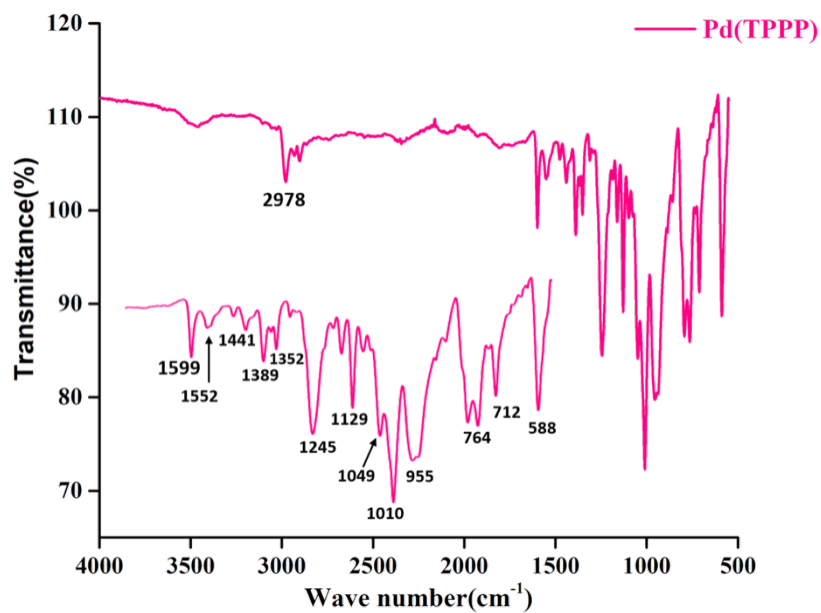

Figure S36. FT-IR spectrum of Pd(TPPP) (neat).

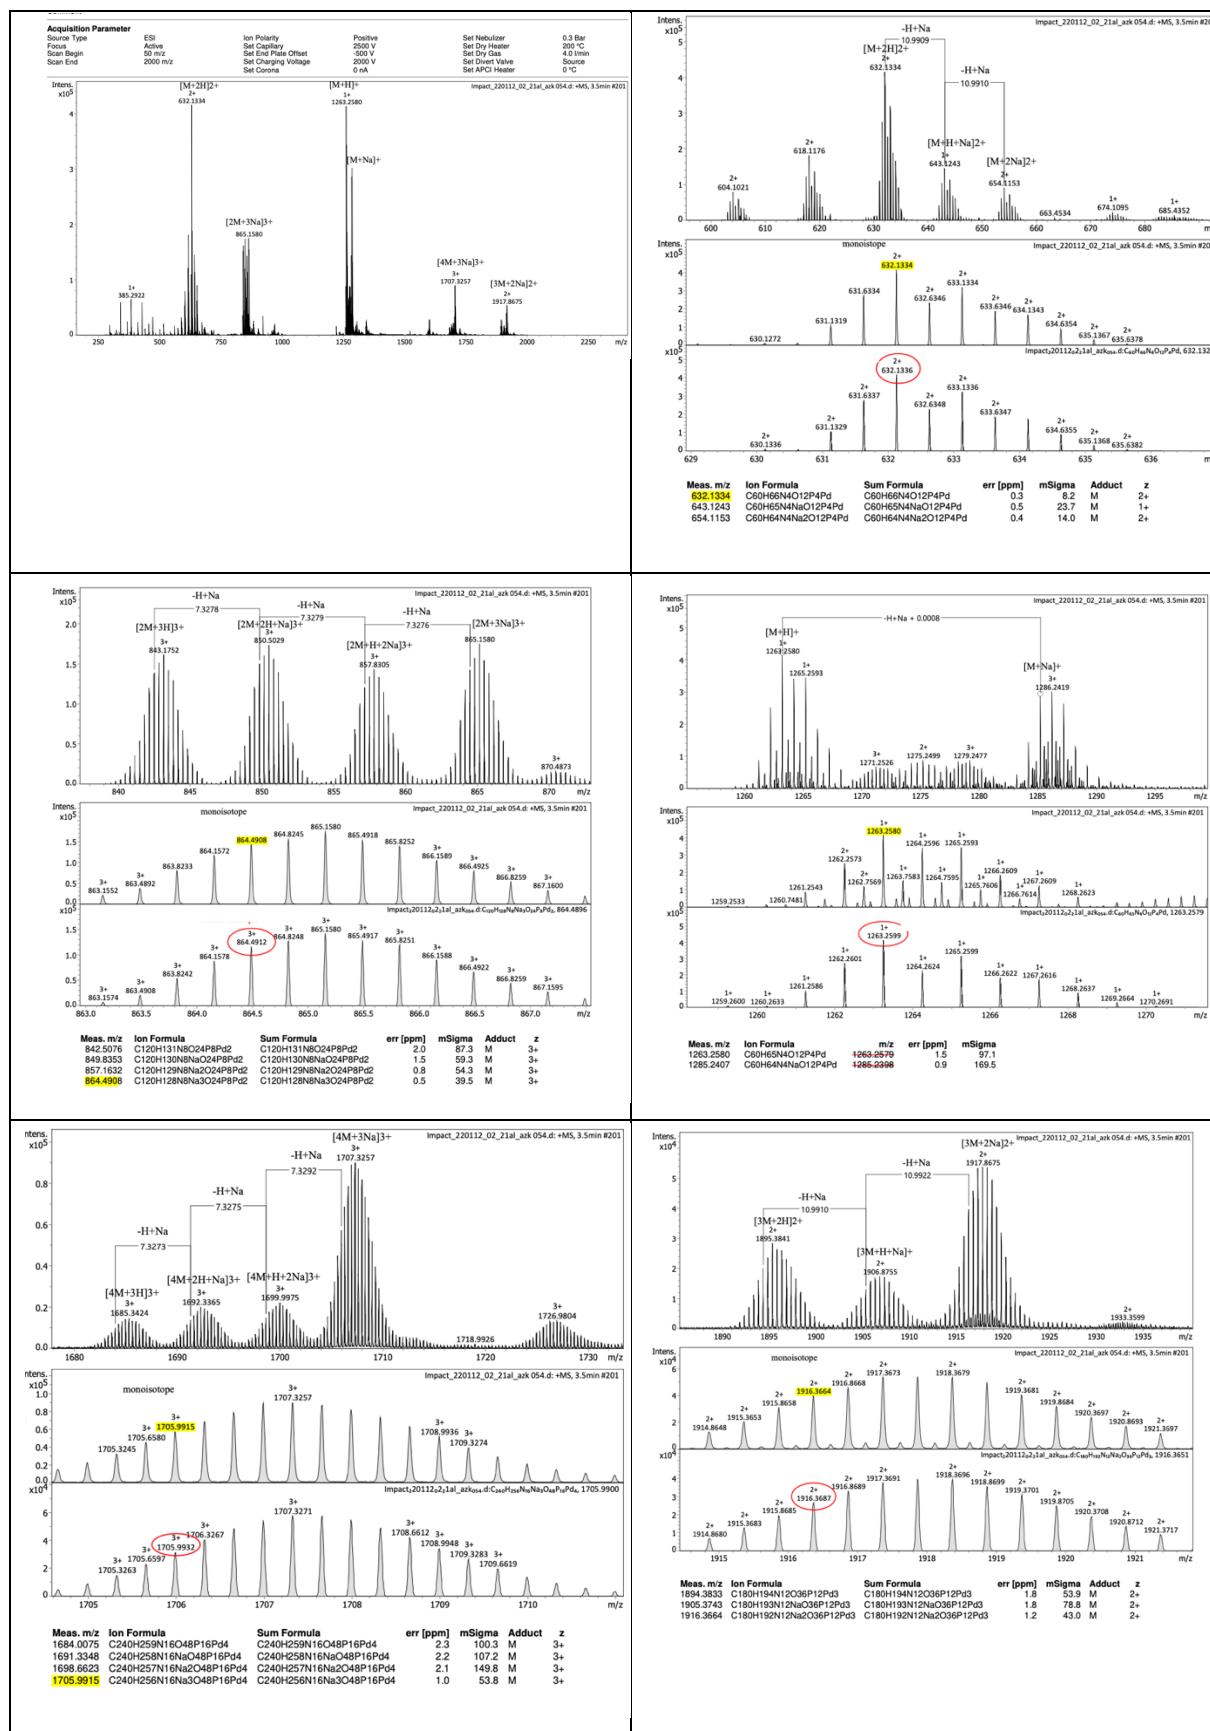

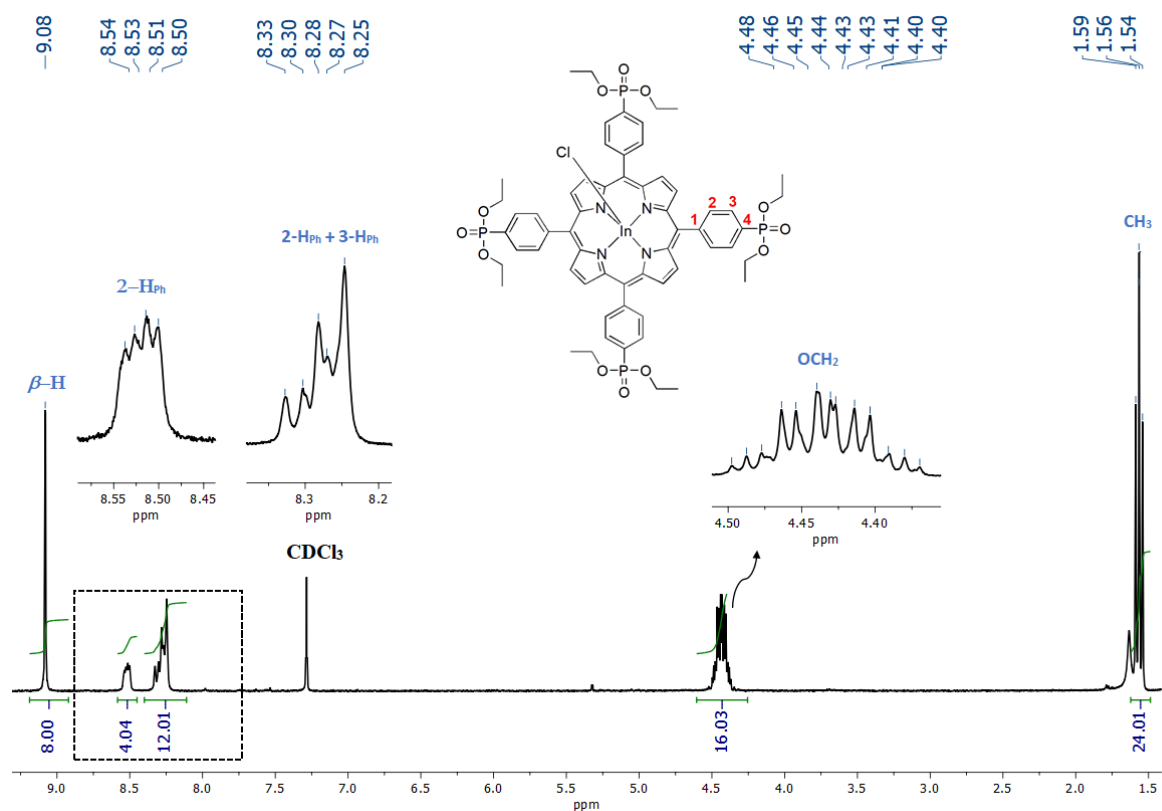

**Figure S38.** <sup>1</sup>H NMR spectrum of In(TPPP) (300 MHz, CDCl<sub>3</sub>, 298 K).

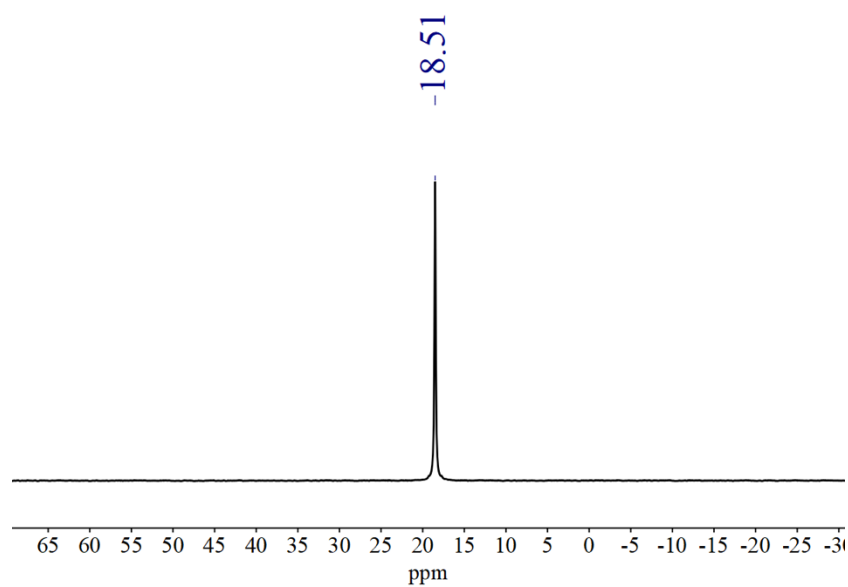

**Figure S39.** <sup>31</sup>P{<sup>1</sup>H} NMR spectrum of In(TPPP) (121 MHz, CDCl<sub>3</sub>, 298 K).

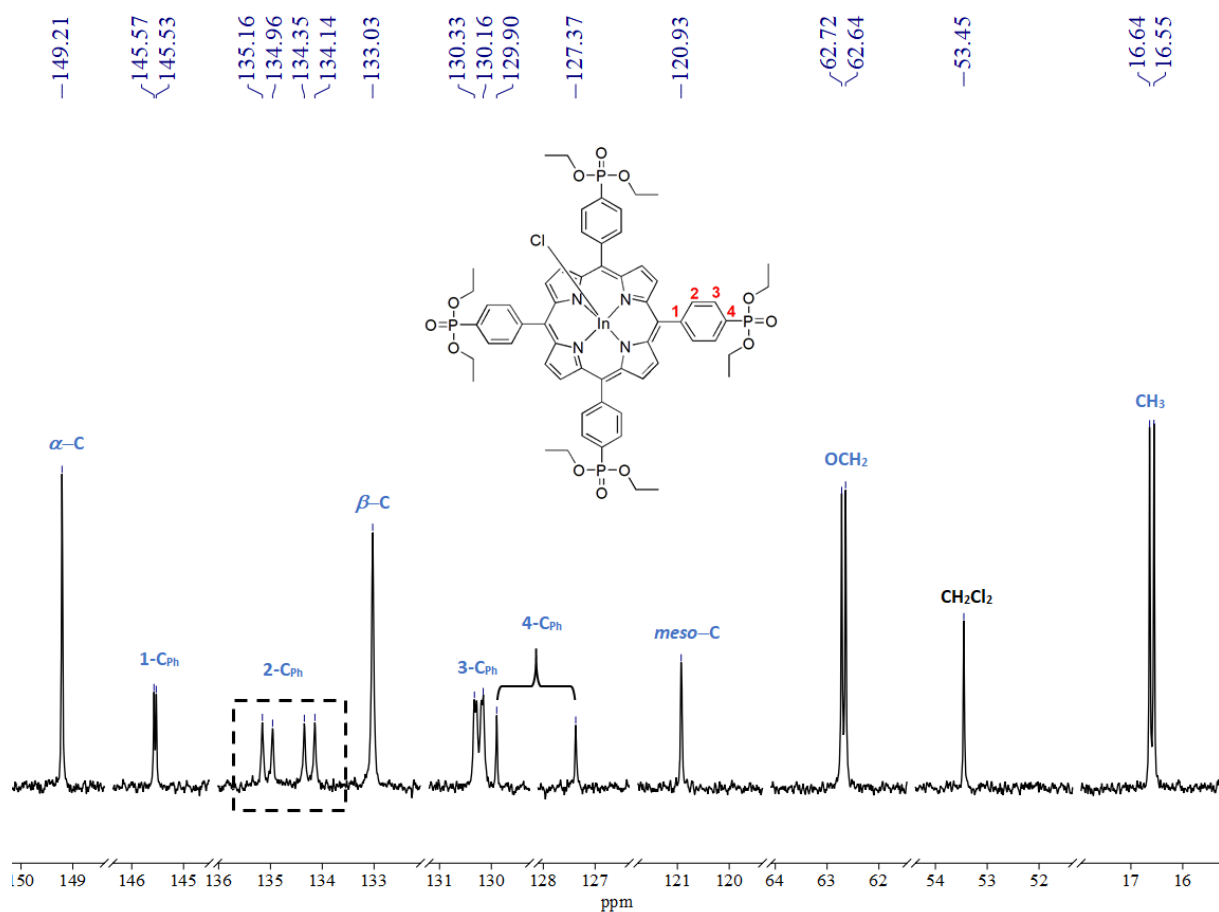

Figure S40.  $^{13}\text{C}\{^1\text{H}\}$  NMR spectrum of In(TPPP) (75 MHz,  $\text{CDCl}_3$ , 298 K).

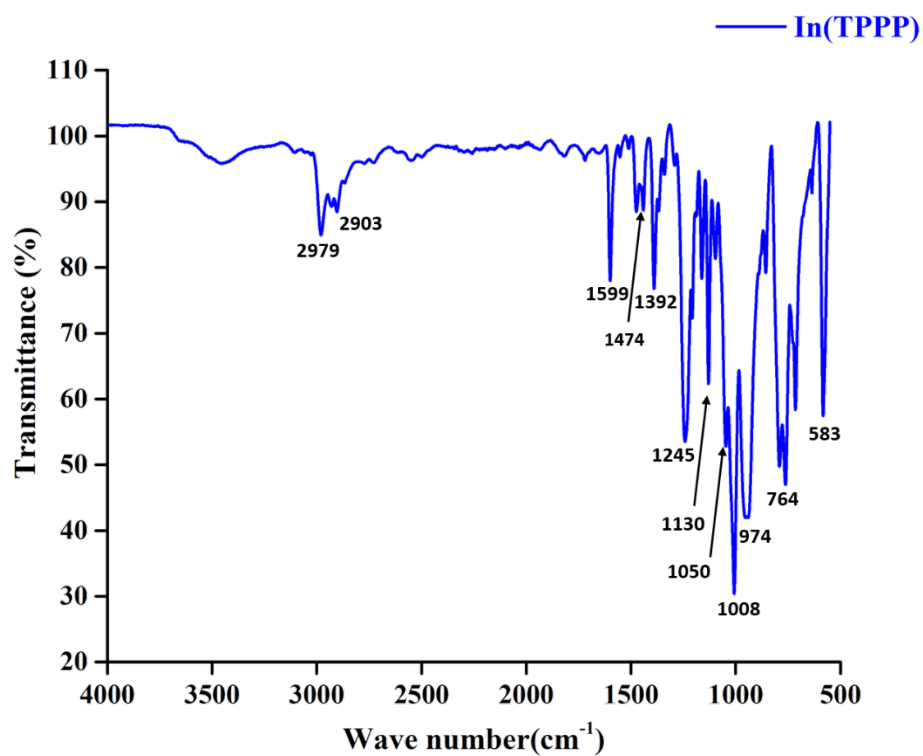

Figure S41. FT-IR spectrum of In(TPPP) (neat).

0.3 Bar  
200 °C  
4.0 l/min  
Source  
0 °C

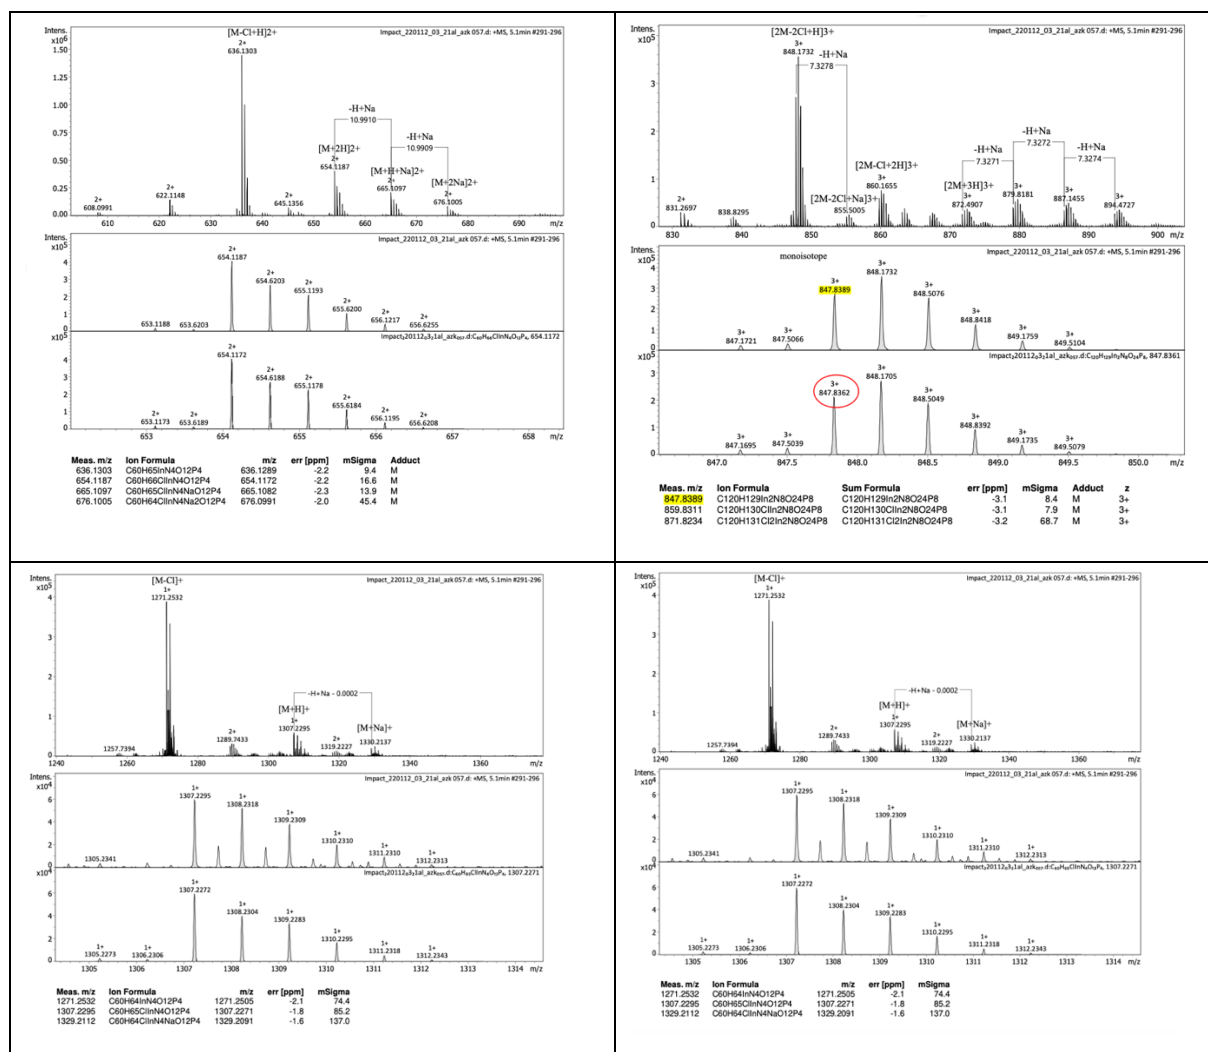

36



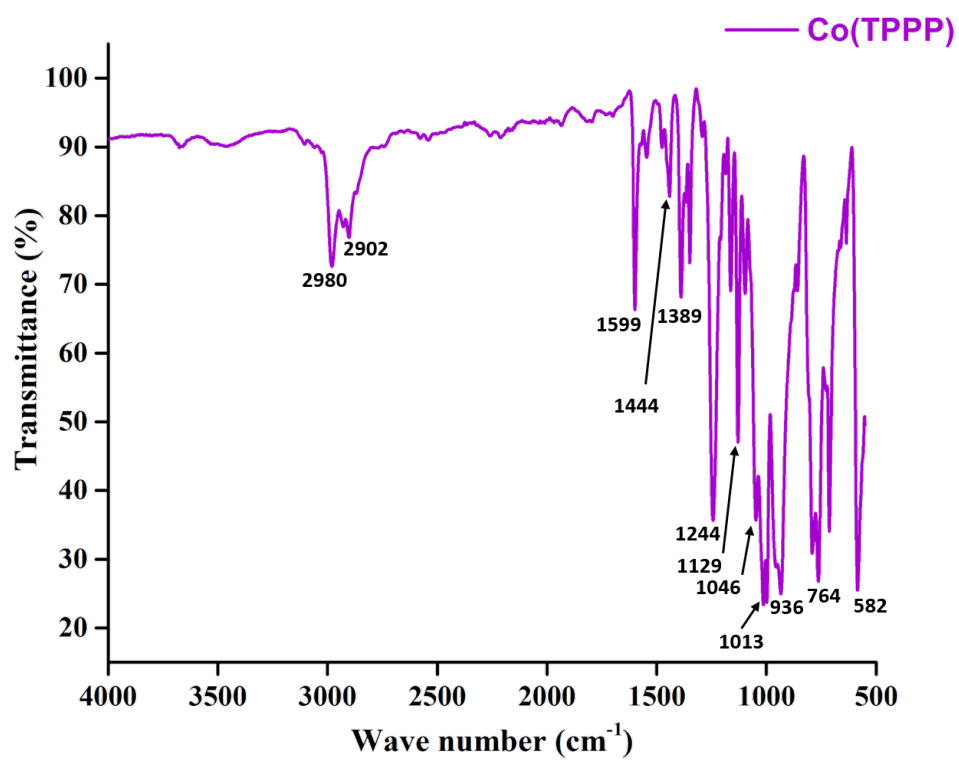

**Figure S43.** FT-IR spectrum of Co(TPPP) (neat).

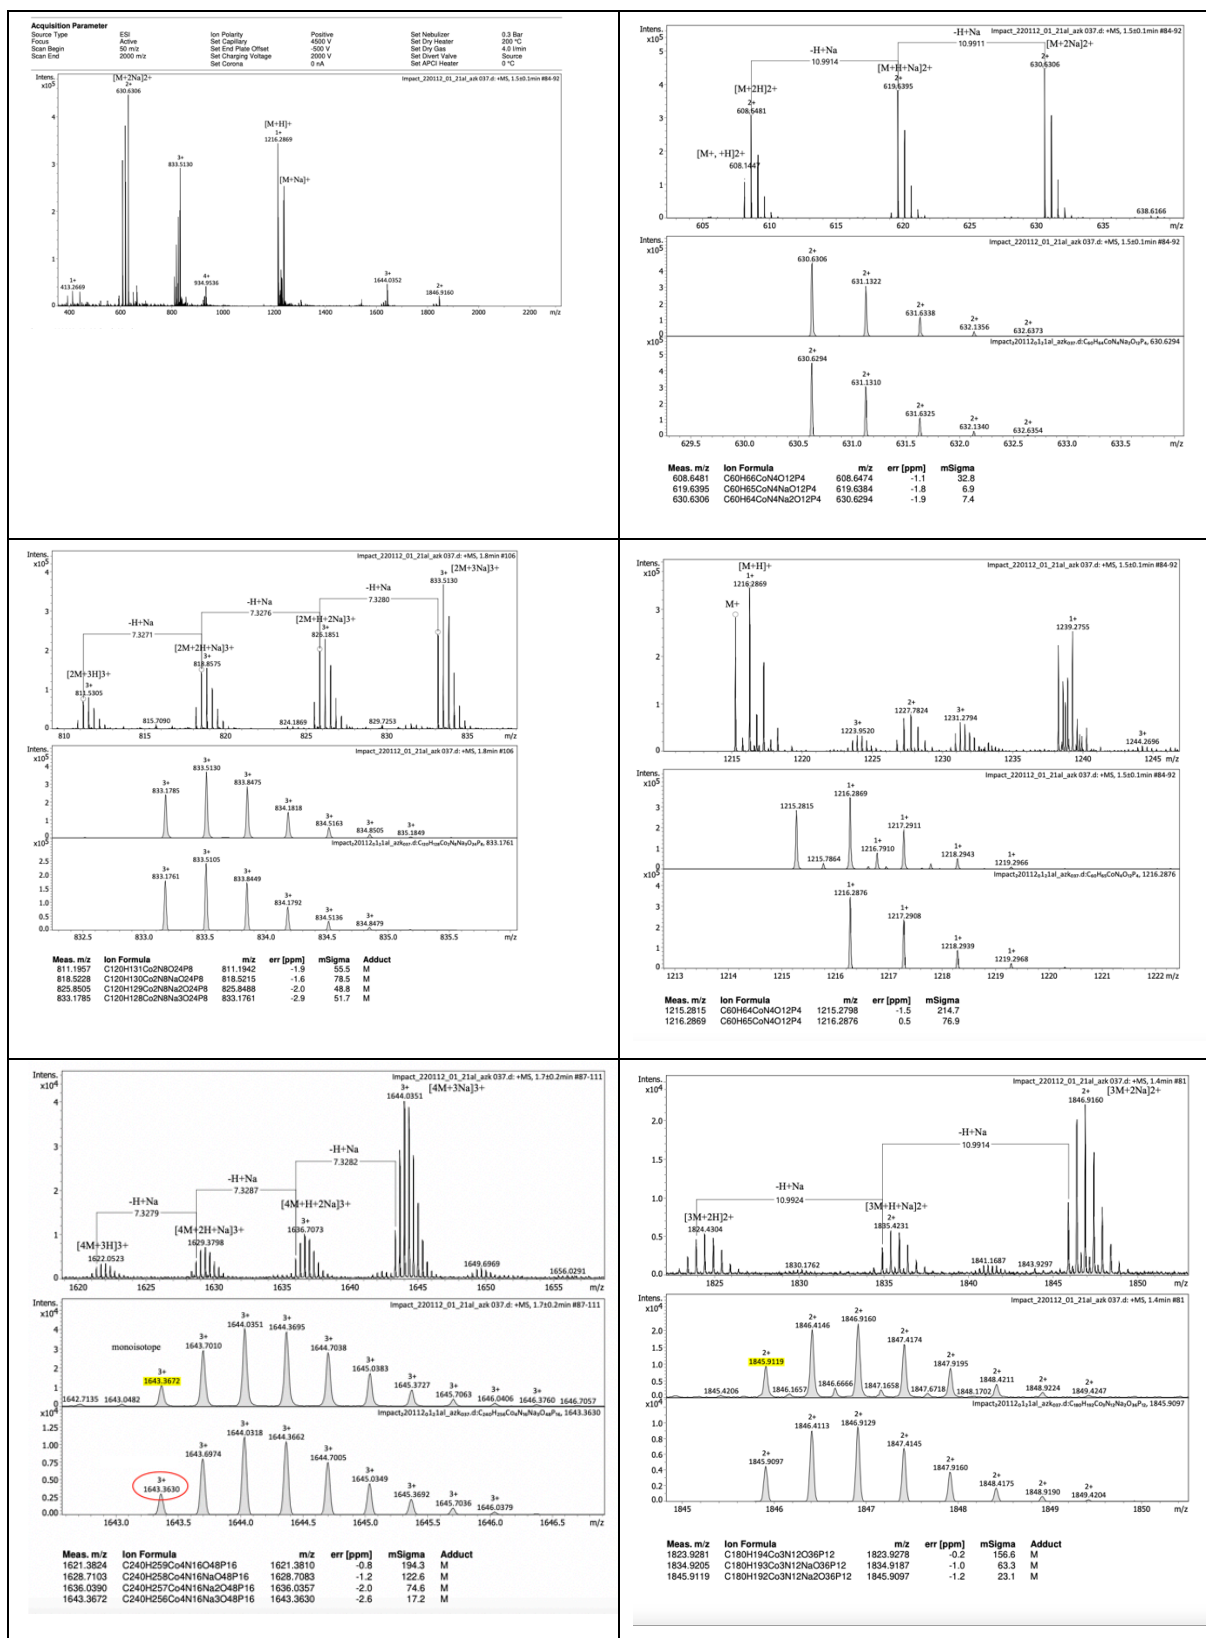

Figure S44. HRMS (ESI) spectrum of Co(TPPP).

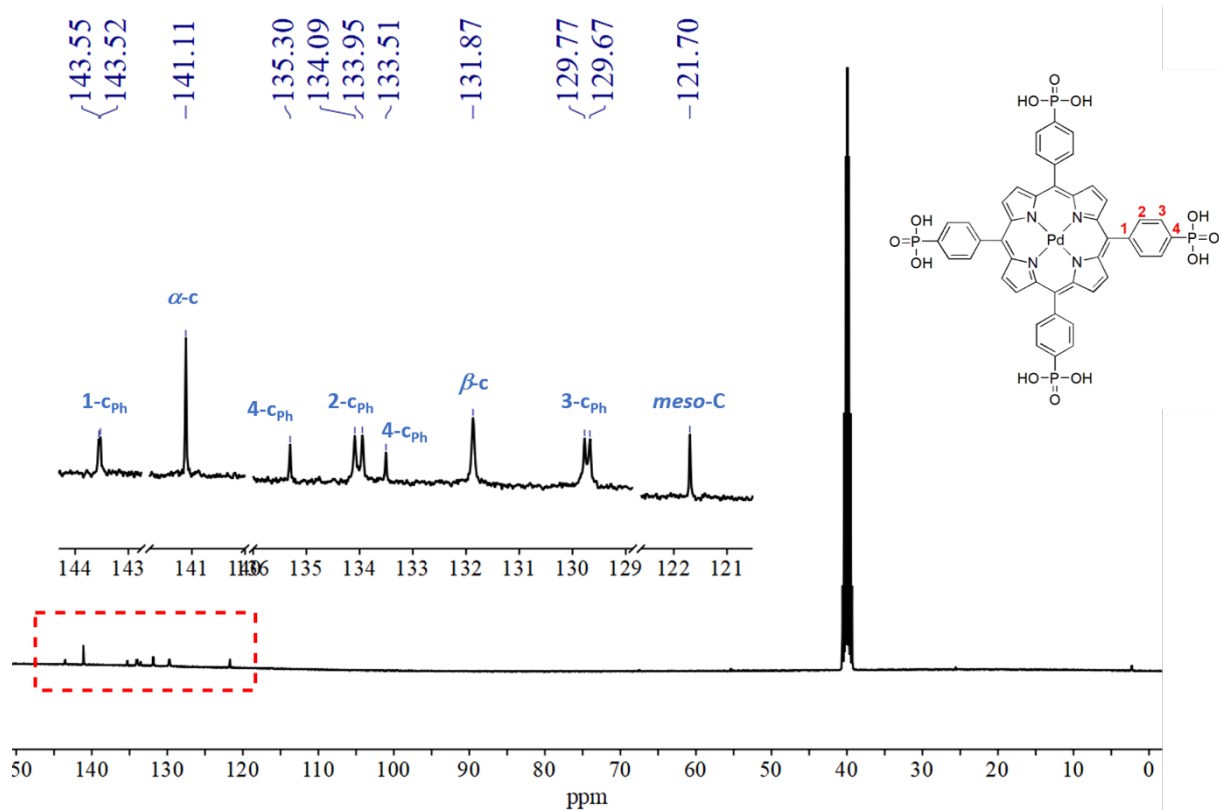

**Figure S45.** <sup>1</sup>H NMR spectrum of H<sub>2</sub>(TPPP-A) (300 MHz, CDCl<sub>3</sub>, 298 K).

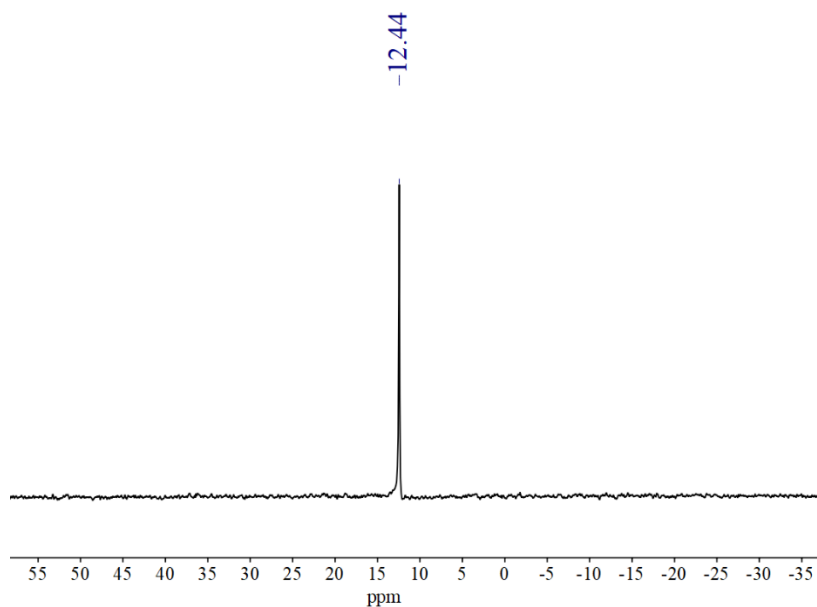

**Figure S46.** <sup>31</sup>P{<sup>1</sup>H} NMR spectrum of H<sub>2</sub>(TPPP-A) (121 MHz, CDCl<sub>3</sub>, 298 K).

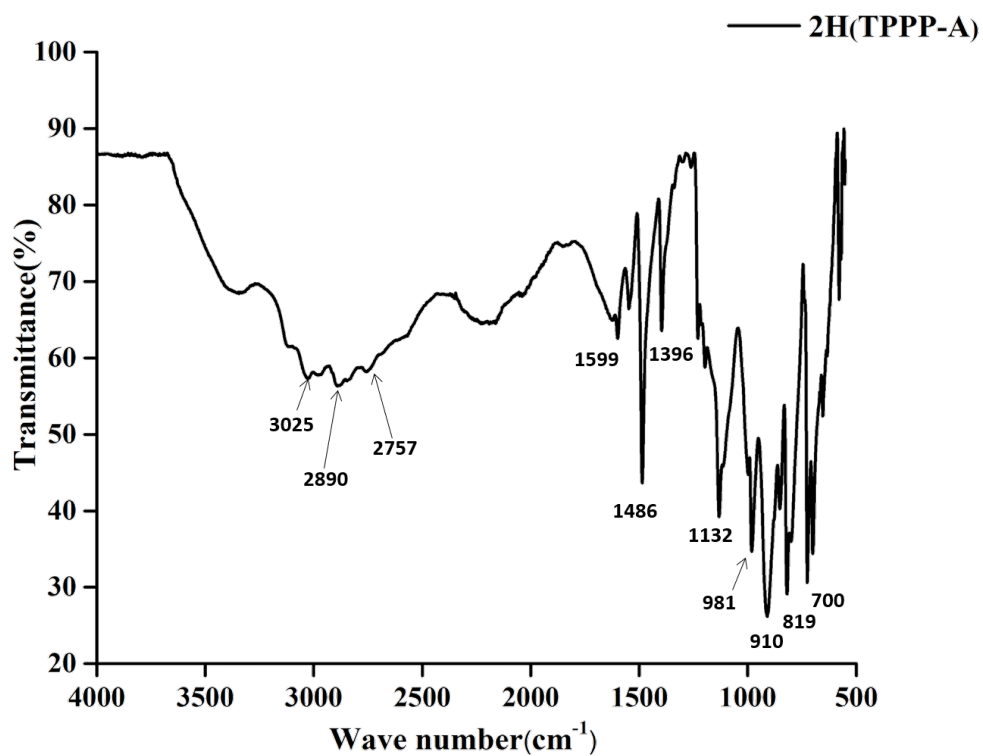

**Figure S47.** FT-IR spectrum of H<sub>2</sub>(TPPP-A) (neat).

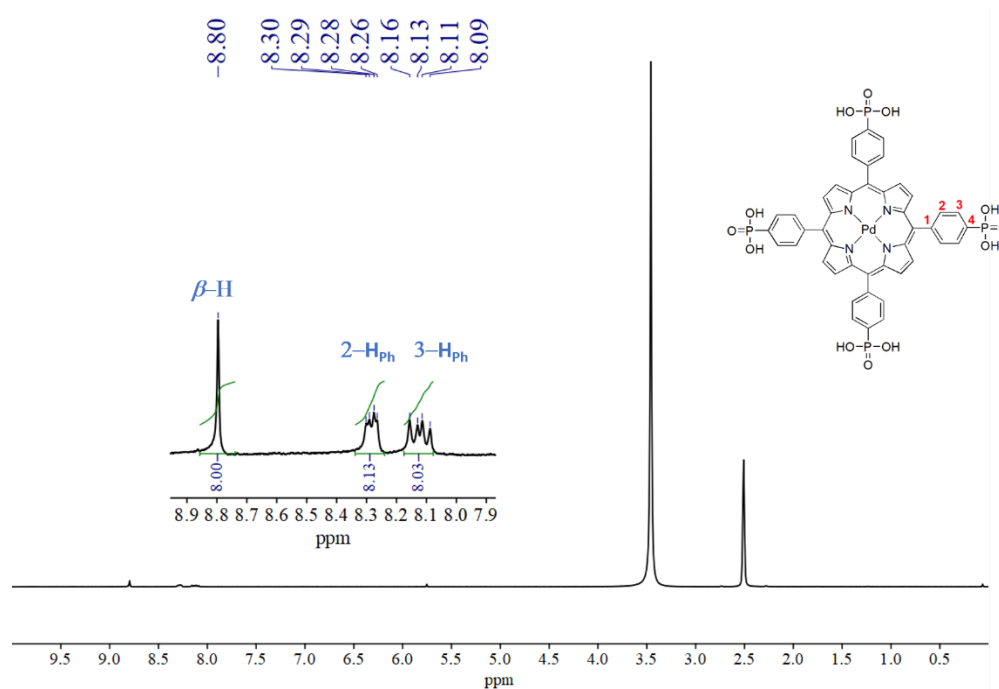

**Figure S48.** <sup>1</sup>H NMR spectrum of Pd(TPPP-A) (300 MHz, CDCl<sub>3</sub>, 298 K).

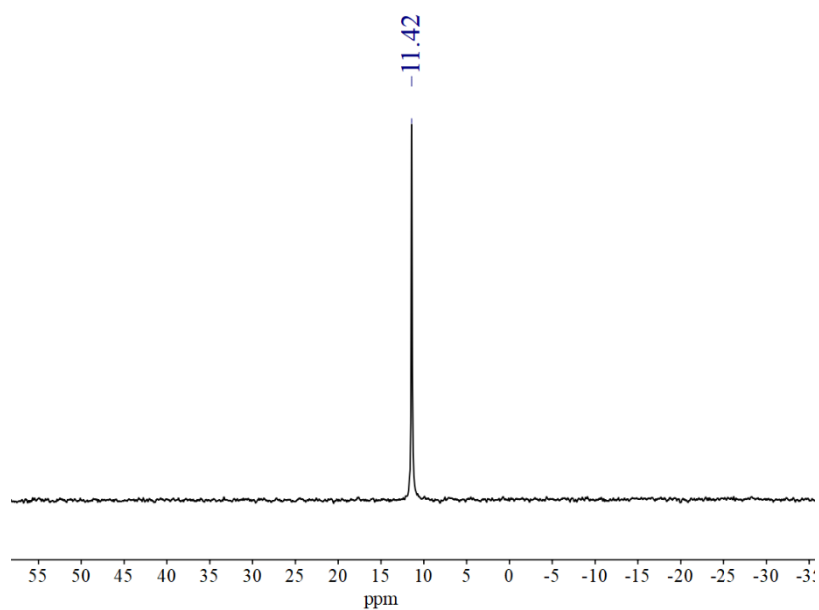

**Figure 49.** <sup>31</sup>P{<sup>1</sup>H} NMR spectrum of Pd(TPPP-A) (121 MHz, CDCl<sub>3</sub>, 298 K).

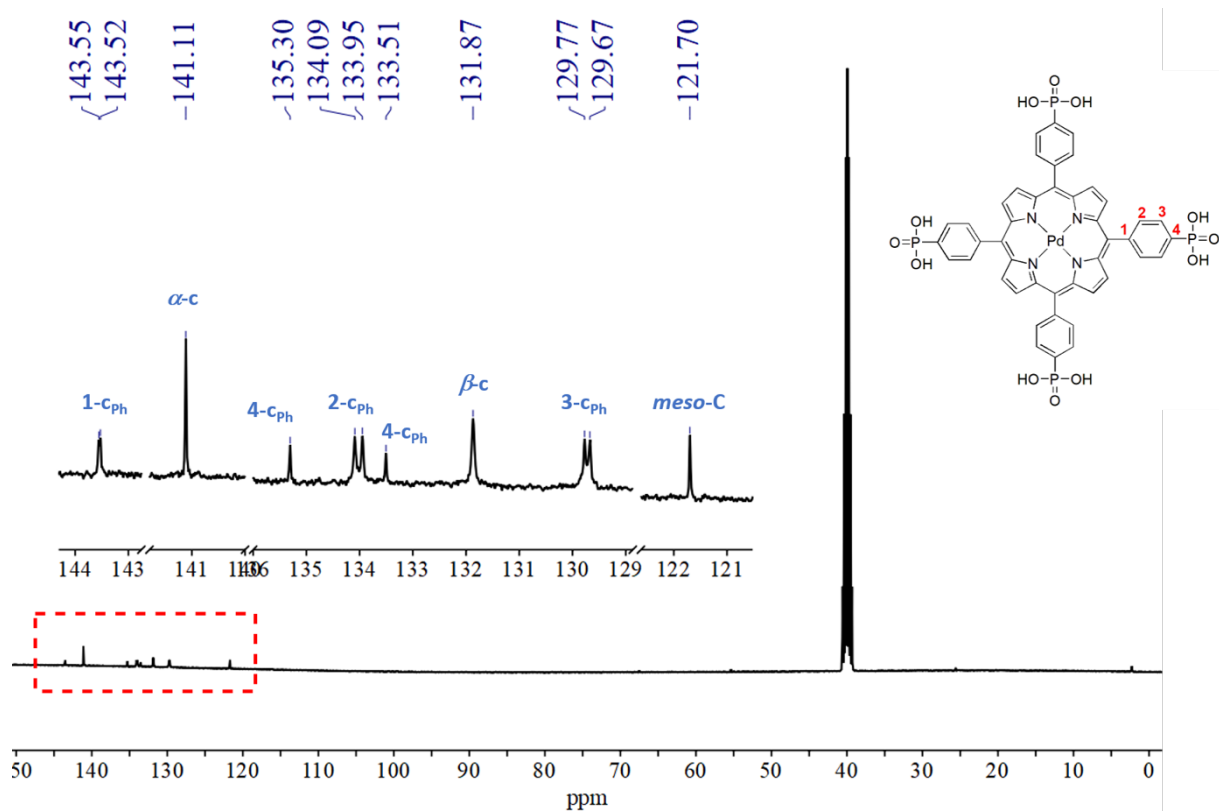

**Figure S50.** <sup>13</sup>C{<sup>1</sup>H} NMR spectrum of Pd(TPPP-A) (75 MHz, CDCl<sub>3</sub>, 298 K).

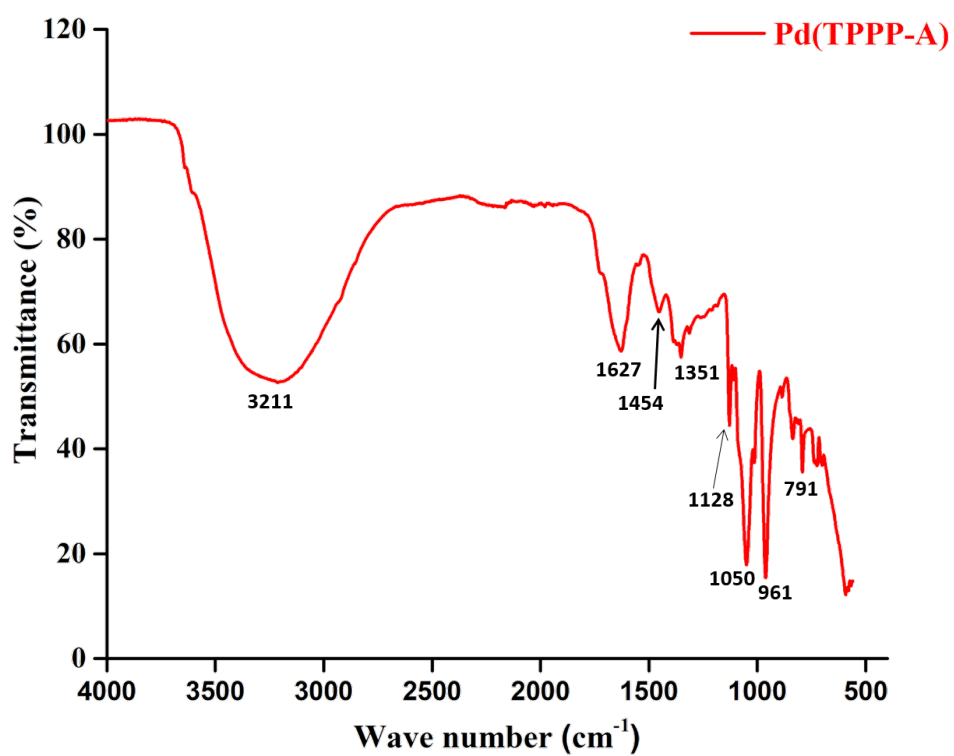

**Figure S51.** FT-IR spectrum of Pd(TPPP-A) (neat).

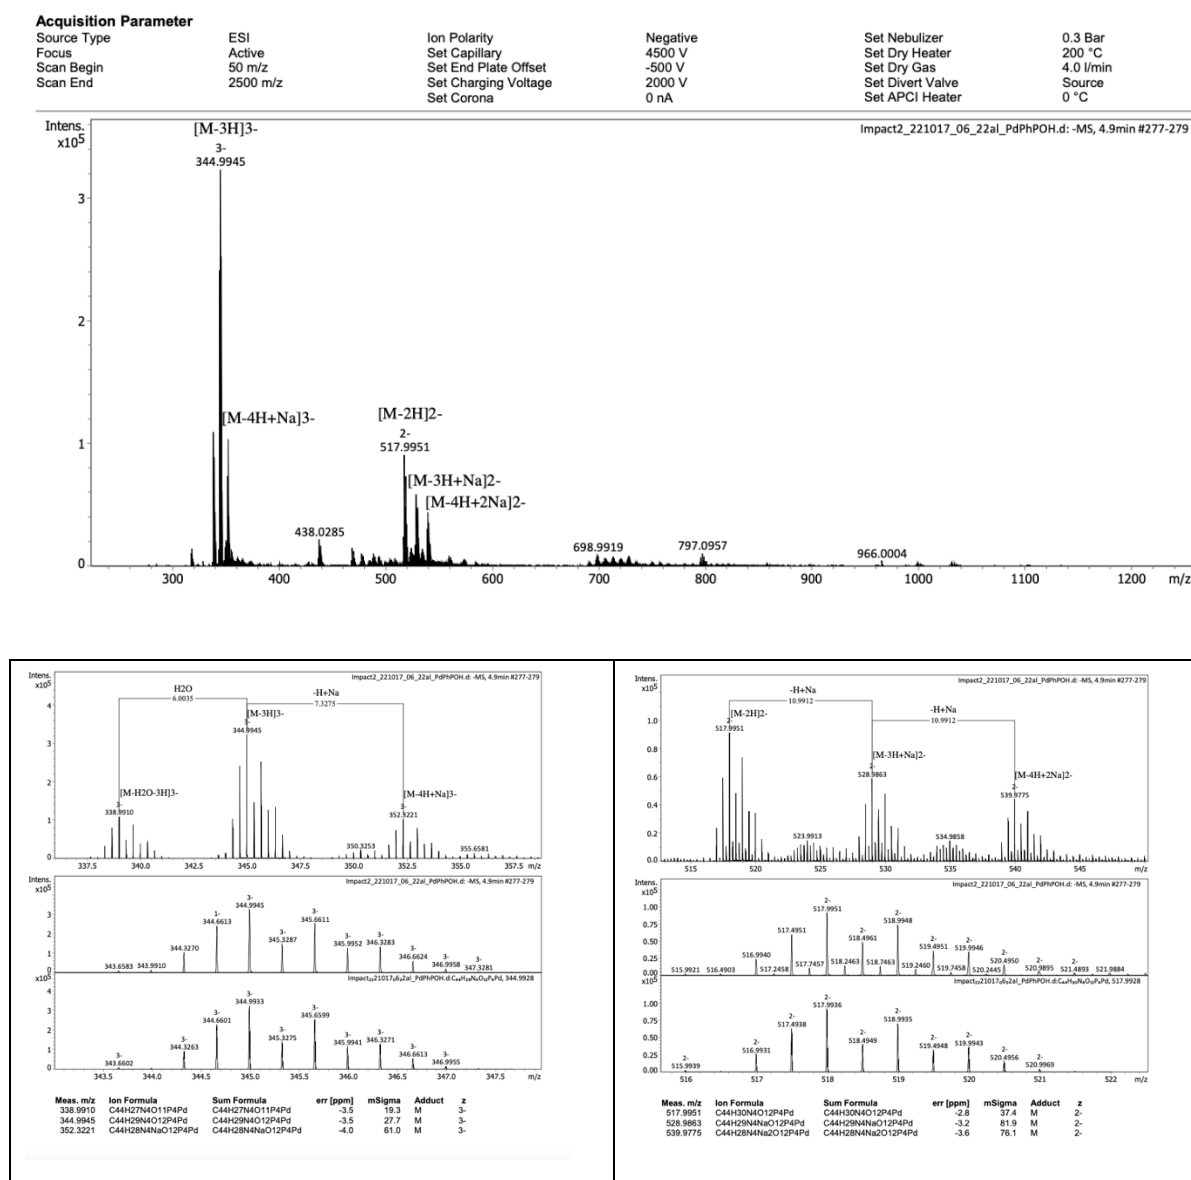

Figure S52. HRMS (ESI) spectrum of Pd(TPPP-A).

## 10. References

1. P. Kubát, K. Lang and P. Anzenbacher, *Biochim. Biophys. Acta*, 2004, **1670**, 40–48.
2. K. M. Kadish, P. Chen, Y. Y. Enakieva, S. E. Nefedov, Y. G. Gorbunova, A. Y. Tsivadze, A. Bessmertnykh-Lemeune, C. Stern and R. Guilard, *J. Electroanal. Chem.*, 2011, **656**, 61–71.
3. T. Rhauderwiek, K. Wolkersdörfer, S. Øien-Ødegaard, K.-P. Lillerud, M. Wark and N. Stock, *Chem. Commun.*, 2018, **54**, 389–392.
4. M. Maares, M. M. Ayhan, K. B. Yu, A. O. Yazaydin, K. Harmandar, H. Haase, J. Beckmann, Y. Zorlu and G. Yücesan, *Chem. – Eur. J.*, 2019, **25**, 11214–11217.
5. S. K. Hau, Y.-J. Cheng, H.-L. Yip, Y. Zhang, H. Ma and A. K. Y. Jen, *ACS Appl. Mater. Inter.*, 2010, **2**, 1892–1902.
6. D. Deniaud, B. Schollorn, D. Mansuy, J. Rouxel, P. Battioni and B. Bujoli, *Chem. Mater.*, 1995, **7**, 995–1000.
7. D. Deniaud, G. A. Spyroulias, J.-F. Bartoli, P. Battioni, D. Mansuy, C. Pinel, F. Odobel and B. Bujoli, *New J. Chem.*, 1998, **22**, 901–905.
8. J. B. Kim, J. J. Leonard and F. R. Longo, *J. Am. Chem. Soc.*, 1972, **94**, 3986–3992.
9. R. Kumar, P. Yadav, A. Kumar and M. Sankar, *Chem. Lett.*, 2015, **44**, 914–916.
10. J. S. Lindsey, H. C. Hsu and I. C. Schreiman, *Tetrahedron Lett.*, 1986, **27**, 4969–4970.
11. J. S. Lindsey and R. W. Wagner, *J. Org. Chem.*, 1989, **54**, 828–836.
12. SADABS, SADABS, *Bruker AXS, Madison, WI* (after 2013).
13. G. Sheldrick, *Acta Crystallogr., Sect. C: Struct. Chem.*, 2015, **71**, 3–8.
14. G. Sheldrick, *Acta Crystallogr., Sect. A: Found. Adv.*, 2015, **71**, 3–8.
15. P. van der Sluis and A. L. Spek, *Acta Crystallogr., Sect. A: Found. Chem.*, 1990, **46**, 194–201.
16. A. Spek, *Acta Crystallogr., Sect. D: Struct. Biol.*, 2009, **65**, 148–155.
